# Supplementary material for: Early Detection and Progression of Subclinical Atherosclerosis in Psoriasis (EDSAP): protocol for an observational, single-centre, prospective cohort study
Source: PubMed Central journal article supplement — BMJ Open. 2023 Sep 26;13(9):e072455. doi: 10.1136/bmjopen-2023-072455 (PMC10533786; doi:10.1136/bmjopen-2023-072455), 2023-09-26
Supplement: bmjopen-2023-072455.draft_revisions.pdf [file bmjopen-2023-072455.draft_revisions.pdf]

# BMJ Open

BMJ Open is committed to open peer review. As part of this commitment we make the peer review history of every article we publish publicly available.

When an article is published we post the peer reviewers' comments and the authors' responses online. We also post the versions of the paper that were used during peer review. These are the versions that the peer review comments apply to.

The versions of the paper that follow are the versions that were submitted during the peer review process. They are not the versions of record or the final published versions. They should not be cited or distributed as the published version of this manuscript.

BMJ Open is an open access journal and the full, final, typeset and author-corrected version of record of the manuscript is available on our site with no access controls, subscription charges or pay-per-view fees (<http://bmjopen.bmj.com>).

If you have any questions on BMJ Open's open peer review process please email [info.bmjopen@bmj.com](mailto:info.bmjopen@bmj.com)

# BMJ Open

## The Early Detection and Progression of Subclinical Atherosclerosis in Psoriasis (EDSAP) study: Rationale and design

|                               |                                                                                                                                                                                                                                                                                                                                                                                                                                                                                                                                                                                                                                                                                                                                                                                                                                                                                                                                                                                                                                                  |
|-------------------------------|--------------------------------------------------------------------------------------------------------------------------------------------------------------------------------------------------------------------------------------------------------------------------------------------------------------------------------------------------------------------------------------------------------------------------------------------------------------------------------------------------------------------------------------------------------------------------------------------------------------------------------------------------------------------------------------------------------------------------------------------------------------------------------------------------------------------------------------------------------------------------------------------------------------------------------------------------------------------------------------------------------------------------------------------------|
| Journal:                      | <i>BMJ Open</i>                                                                                                                                                                                                                                                                                                                                                                                                                                                                                                                                                                                                                                                                                                                                                                                                                                                                                                                                                                                                                                  |
| Manuscript ID                 | bmjopen-2023-072455                                                                                                                                                                                                                                                                                                                                                                                                                                                                                                                                                                                                                                                                                                                                                                                                                                                                                                                                                                                                                              |
| Article Type:                 | Protocol                                                                                                                                                                                                                                                                                                                                                                                                                                                                                                                                                                                                                                                                                                                                                                                                                                                                                                                                                                                                                                         |
| Date Submitted by the Author: | 03-Feb-2023                                                                                                                                                                                                                                                                                                                                                                                                                                                                                                                                                                                                                                                                                                                                                                                                                                                                                                                                                                                                                                      |
| Complete List of Authors:     | <p>Abbad- Jaime de Aragón, Carlota; Hospital Universitario Ramon y Cajal, Dermatology<br/>         Berna-Rico, Emilio; Hospital Universitario Ramon y Cajal, Dermatology<br/>         Ballester-Martinez, María Asunción; Hospital Universitario Ramon y Cajal, Dermatology<br/>         Jaén, Pedro; Hospital Universitario Ramon y Cajal, Dermatology<br/>         Solís, Jorge; Hospital Universitario 12 de Octubre, Cardiology; Atria Clinic<br/>         G. Barderas, María; Hospital Nacional de Paraplégicos, IDISCAM. Toledo, Spain, Department of Vascular Physiopathology<br/>         Fernández- Frieria, Leticia ; Atria Clinic; HM Hospitales, Centro Integral de Enfermedades Cardiovasculares HM CIEC<br/>         N Mehta, Nehal; Department of Cardiology,, George Washington Medical Center, Washington D.C, USA<br/>         Gelfand, Joel ; University of Pennsylvania<br/>         González-Cantero, Álvaro; Hospital Universitario Ramon y Cajal, Dermatology; Universidad Francisco de Vitoria, Facultad de Medicina</p> |
| Keywords:                     | Psoriasis < DERMATOLOGY, Coronary heart disease < CARDIOLOGY, Computed tomography < RADIOLOGY, Ultrasound < RADIOLOGY & IMAGING                                                                                                                                                                                                                                                                                                                                                                                                                                                                                                                                                                                                                                                                                                                                                                                                                                                                                                                  |
|                               |                                                                                                                                                                                                                                                                                                                                                                                                                                                                                                                                                                                                                                                                                                                                                                                                                                                                                                                                                                                                                                                  |

SCHOLARONE™  
Manuscripts

1  
2  
3 **Title:** The Early Detection and Progression of Subclinical Atherosclerosis in Psoriasis (EDSAP):  
4  
5 Protocol for an observational, prospective cohort study.  
6  
7

8 **Authors:** Carlota Abbad-Jaime de Aragón, MSc<sup>a\*</sup>, Emilio Berna- Rico, MD<sup>a\*</sup>, María Asunción  
9  
10 Ballester-Martinez, MD<sup>a</sup>, Pedro Jaén, MD, PhD<sup>a</sup>, Jorge Solís, MD, PhD<sup>b,c</sup>, María G. Barderas,  
11  
12 PhD<sup>d</sup>, Leticia Fernández- Frieria, MD, PhD<sup>c,e</sup>, Nehal N Mehta, MD, MDSCE<sup>f</sup>, Joel M Gelfand,  
13  
14 MD, MDSCE<sup>g</sup>, Álvaro González-Cantero, MD, PhD<sup>a,h</sup>  
15  
16

17 \*These authors contributed equally.  
18  
19

- 20 a. Department of dermatology, Hospital Universitario Ramón y Cajal, IRYCIS. Madrid,  
21  
22 Spain.  
23  
24  
25 b. Department of Cardiology, Hospital Universitario 12 de Octubre. Madrid, Spain.  
26  
27  
28 c. AtriaClinic, Madrid.  
29  
30  
31 d. Department of Vascular Physiopathology, Hospital Nacional de Paraplégicos, IDISCAM.  
32  
33 Toledo, Spain.  
34  
35  
36 e. Centro Integral de Enfermedades Cardiovasculares HM CIEC, HM Hospitales, Madrid,  
37  
38 Spain.  
39  
40  
41 f. Department of Cardiology, George Washington Medical Center, Washington D.C, USA.  
42  
43  
44 g. Department of Biostatistics, Epidemiology & Informatics, Perelman School of Medicine,  
45  
46 University of Pennsylvania, Philadelphia, Pennsylvania, USA; Department of  
47  
48 Dermatology, Perelman School of Medicine, University of Pennsylvania, Philadelphia,  
49  
50 Pennsylvania, USA.  
51  
52  
53 h. Facultad de Medicina, Universidad Francisco de Vitoria, Ctra. Pozuelo-Majadahonda  
54  
55 KM 1.800, 28223 Pozuelo de Alarcón, Spain.  
56  
57  
58  
59  
60

1  
2  
3 25  
4  
5

6 **Corresponding author:**  
7

8 27 Álvaro González-Cantero.  
9

10  
11 28 Dermatology Department, Ramon y Cajal University Hospital. IRYCIS. Colmenar Viejo km  
12

13 29 9.100, 28034 Madrid, Spain.  
14

15  
16 30 e-mail: alvarogonzalezcantero@gmail.com  
17

18  
19 31 Phone: +34 620 408 898; FAX +3491373508  
20

21  
22 **Keywords:**  
23

24 33 Psoriasis; inflammation; cardiovascular disease; vascular imaging; coronary CTA; proteomics.  
25

26  
27 34 **Abstract word count:** 284 words  
28

29  
30 35 **Manuscript word count:** 3.813 words  
31

32  
33 36 **Number of figures:** 4  
34

35  
36 37  
37

38  
39 38  
40

41  
42 39  
43

44  
45 40  
46

47  
48 41  
49

50  
51 42  
52

53  
54 43  
55

56  
57 44  
58

59  
60 45

1  
2  
3 46  
4  
5  
6 47  
7  
8  
9 48  
10  
11 49  
12  
13 50  
14  
15 51  
16  
17 52  
18  
19  
20 53  
21  
22 54  
23  
24 55  
25  
26 56  
27  
28 57  
29  
30 58  
31  
32 59  
33  
34 60  
35  
36 61  
37  
38 62  
39  
40 63  
41  
42 64  
43  
44 65  
45  
46 66  
47  
48  
49  
50 67  
51  
52 68  
53  
54 69  
55  
56  
57 70  
58  
59  
60 71

## **ABSTRACT**

**Introduction:** Life expectancy of patients with psoriasis is reduced by 4-5 years due to cardiovascular disease with an increased risk of myocardial infarction at an earlier age compared to general population. This increased risk is independent of traditional cardiovascular risk factors and higher in moderate-to-severe forms of psoriasis. Inflammation may play a key role in the development of atherosclerosis in these patients.

**Methods and analysis:** A prospective cohort study, Early Detection and Progression of Subclinical Atherosclerosis in Psoriasis (EDSAP), was initiated in January 2020 to investigate the presence and progression of subclinical atherosclerosis in patients with psoriasis. 120 patients aged 30-65 years and eligible for biological treatment have been recruited at Hospital Ramón y Cajal in Madrid, Spain. Patients undergo a baseline visit, and one-year follow up visit after starting biologic therapy. Each visit includes: assessment of cardiovascular risk factors, screening for subclinical atherosclerosis by 2D/3D ultrasound of carotid and femoral arteries, cardiac computed tomography of coronary arteries and blood sampling. All baseline visits were completed by December 2022, and the remaining follow-up visits will be concluded by the end of 2023. The EDSAP study aims to identify new molecular and imaging markers associated with the presence of atherosclerosis and its progression in a chronic inflammatory state such as psoriasis. This has the potential to: (1) help improve primary cardiovascular prevention strategies in these patients; (2) understand the effect of biologic drugs on the cardiovascular system; (3) serve as a model for understanding atherosclerosis in other chronic inflammatory diseases.

**Ethics and dissemination:** The study protocol has been approved by the Institutional Review Board of the Hospital Ramón y Cajal in Madrid. We will present our findings at national and international congresses, and peer-reviewed journals.

1  
2  
3 72  
4  
56 73 **Strengths and limitations**  
7

- 8  
9 74 • Strict application of protocols, the collection of biobank samples and the prospective data  
10  
11 75 collection which allows to evaluate the impact of anti-inflammatory therapies on  
12  
13 76 atheroma plaque characterization and modulation.
- 14  
15 77 • The application of state-of-the-art scientific techniques to measure the anatomical and  
16  
17 78 biological characteristics of subclinical atherosclerosis.
- 18  
19 79 • Being an observational study, it is more vulnerable to potential confounding factors  
20  
21 80 compared to randomized controlled trials.
- 22  
23  
24 81 • The open-label, non-randomized use of psoriasis treatments in a small sample size and  
25  
26 82 with a short follow-up duration.

27  
28  
29 83  
30  
31 84  
32  
33  
34 85  
35  
36  
37  
38  
39  
40  
41  
42  
43  
44  
45  
46  
47  
48  
49  
50  
51  
52  
53  
54  
55  
56  
57  
58  
59  
60

1  
2  
3  
4  
5  
6  
7  
8  
9  
10  
11  
12  
13  
14  
15  
16  
17  
18  
19  
20  
21  
22  
23  
24  
25  
26  
27  
28  
29  
30  
31  
32  
33  
34  
35  
36  
37  
38  
39  
40  
41  
42  
43  
44  
45  
46  
47  
48  
49  
50  
51  
52  
53  
54  
55  
56  
57  
58  
59  
60

## 86 **INTRODUCTION**

87 Psoriasis is a complex chronic inflammatory and immune-mediated disease of the skin and joints  
88 associated with multiple comorbidities (1,2). The life expectancy of patients with psoriasis is  
89 reduced by 4-5 years due to cardiovascular (CV) disease, and there is an increased risk of  
90 myocardial infarction at an earlier age compared to individuals without the disease (3,4). This  
91 elevated CV risk could be due to systemic inflammation characteristic, especially in the moderate-  
92 to-severe forms of the disease (5,6). Therefore, classical screening methods such as the  
93 Framingham risk score, which is based on classical cardiovascular risk factors (CVRFs), do not  
94 reliably assess the risk of coronary heart disease in patients with psoriasis (4,7).

95 Detection of atherosclerosis in its subclinical stage may help to identify strategies to halt the  
96 development of the disease. Many imaging studies in patients with psoriasis assessed subclinical  
97 atherosclerosis in individual vascular territories (4,8–10), but given the systemic nature of  
98 atherosclerosis, a multi-territorial analysis has the potential to provide a more comprehensive  
99 overview of the distribution and burden of atherosclerosis in these patients (11). The natural  
100 history of atherosclerosis involves a prolonged subclinical phase, where the disease is usually  
101 detected only at an advanced stage or after a CV event. Early detection of subclinical  
102 atherosclerosis and adoption of primary prevention measures, including adequate control of  
103 systemic inflammation, may minimise the risk of CV disease in patients with psoriasis. It has  
104 therefore been proposed that these patients should undergo comprehensive screening for  
105 subclinical atherosclerosis (4), a proposal that has arisen from the need to find a non-invasive,  
106 simple and widely available biomarker for its early detection (12).

107 The most widely used and validated technique for screening subclinical atherosclerosis is vascular  
108 ultrasound (VUS), a reproducible, non-invasive technique with no side effects. In the last years,  
109 there has been a particular interest in the study of subclinical atherosclerosis in the femoral  
110 arteries. Studies in healthy adults have shown that femoral plaques are more prevalent than carotid  
111 plaques and are more associated with traditional CVRFs and coronary calcium (12,13), as well as  
112 being an independent predictor of future CV events (11,14). Interestingly, in the PESA study

1  
2  
3 113 (middle-aged participants from the general population), the presence of iliofemoral disease  
4  
5 114 increases the risk of concurrent coronary calcium and is predictive of disease elsewhere (11). In  
6  
7 115 fact, screening femoral arteries with vascular ultrasound has been introduced in current clinical  
8  
9 116 practice guidelines as a risk modifier in individuals at low or moderate risk individuals (15). In  
10  
11 117 this regard, our research group evaluated the usefulness of femoral artery ultrasound for the  
12  
13 118 detection of subclinical atherosclerosis in psoriasis. We observed that screening of femoral  
14  
15 119 plaques improves the detection of subclinical atherosclerosis in these patients, whereas carotid  
16  
17 120 artery scanning was not sufficiently accurate (12,16). Semiautomated 3-dimensional vascular  
18  
19 121 ultrasound (3DVUS) has been proposed as a better method for quantifying peripheral  
20  
21 122 atherosclerotic burden. 3DVUS is a feasible, reproducible and novel imaging technique to  
22  
23 123 quantify early carotid and femoral atherosclerotic burden in large populations. Furthermore, 3D-  
24  
25 124 VUS offers incremental value over the presence of plaque alone in its association with  
26  
27 125 cardiovascular risk (13,17). In the last decade, the advent of coronary computed tomography  
28  
29 126 angiography (CCTA) has emerged as a promising non-invasive tool to assess coronary artery  
30  
31 127 structure over time. It has been proposed that the ability of CCTA to identify and quantify the  
32  
33 128 morphology of high-risk plaques, together with therapy monitoring, will eventually become the  
34  
35 129 cornerstone of treatment personalisation (18).  
36  
37  
38  
39 130 Several studies have shown the potential benefits of biologic therapies on CV disease risk in  
40  
41 131 patients with psoriasis. Biologic therapy in severe psoriasis has been associated with a favourable  
42  
43 132 modulation of coronary plaque indices by CCTA (16). These results support the need to expand  
44  
45 133 our knowledge on the potential effects of biologic therapies in atherosclerosis.  
46  
47  
48 134 In addition to imaging techniques, there is a need to discover and validate new molecular markers  
49  
50 135 that have practical value for clinical intervention as well as for identifying and elucidating CV  
51  
52 136 disease processes at the individual level. Therefore, proteomic studies are needed to gain further  
53  
54 137 insights in psoriasis-associated accelerated atherosclerosis in order to obtain a comprehensive  
55  
56 138 overview of this high-risk population.  
57  
58  
59  
60



1  
2  
3 139 This article describes the rationale, aims and methods of the EDSAP study protocol, a longitudinal  
4  
5 140 cohort study to decipher the molecular, imaging and clinical characteristics of this accelerated  
6  
7 141 atherosclerosis phenotype associated with psoriasis and to explore the effect of anti-inflammatory  
8  
9 142 therapies on it.  
10

### 11 12 143 **STUDY OBJECTIVES** 13

14  
15 144 The objectives of the EDSAP study are: (1) to assess the prevalence, vascular distribution and  
16  
17 145 burden of subclinical atherosclerosis in patients with psoriasis and its relationship with  
18  
19 146 inflammatory biomarkers and CV risk algorithms using 2DVUS of carotid and femoral arteries,  
20  
21 147 3DVUS of carotid and femoral arteries and CCTA; (2) to characterize the composition of  
22  
23 148 atherosclerotic plaques by CCTA and 3D-VUS of the carotid and femoral arteries; (3) to evaluate  
24  
25 149 the effect of different treatments used in psoriasis on the progression and characterisation of  
26  
27 150 subclinical atherosclerosis in different arterial territories assessed by non-invasive imaging  
28  
29 151 techniques; and (4) to characterise the atherosclerosis process in patients with psoriasis using  
30  
31 152 laboratory analysis and "-omics" technologies, as well as to evaluate changes at the molecular  
32  
33 153 level after treatment of the skin disease.  
34  
35

### 36 37 154 **STUDY DESIGN AND POPULATION** 38

39  
40 155 The EDSAP study is an observational, longitudinal, prospective cohort study that includes  
41  
42 156 psoriasis patients who will undergo a one-year medical follow-up (Figure 1). Recruitment is  
43  
44 157 voluntary among patients attending dermatology consultations at the Hospital Ramón y Cajal,  
45  
46 158 Madrid (Spain).  
47

48  
49 159 The study includes participants aged between 30 to 65 years, diagnosed with psoriasis clinically  
50  
51 160 by an expert physician and deemed suitable for biologic therapy by the investigator. Exclusion  
52  
53 161 criteria are as follows: history of CV disease (myocardial infarction, angina pectoris, peripheral  
54  
55 162 vascular disease, aortic aneurysm, angioplasty, cardiac surgery, atrial fibrillation or any other  
56  
57 163 cardiological condition), current oncological treatment, history of transplantation with active  
58  
59 164 immunosuppressive or immunomodulatory treatment, morbid obesity (body mass index  $\geq 40$   
60

1  
2  
3 165 kg/m<sup>2</sup>), diabetes mellitus, chronic liver disease, , chronic kidney disease (glomerular filtration rate  
4  
5 166 <60 mL/min/1.73 m<sup>2</sup>), other chronic inflammatory disease, presence of any pathology that  
6  
7 167 decreases life expectancy to less than 3 years, or any disease or condition that could affect  
8  
9 168 adherence to study procedures. In addition, participants will be excluded if they have had a chest  
10  
11 169 computed tomography (CT) scan in the previous year, are pregnant or breastfeeding.

## 14 170 **DATA COLLECTION**

17 171 Two study visits are scheduled for each participant: at baseline and 1-year follow up. Both of  
18  
19 172 them include a clinical interview, physical examination (height, weight, waist circumference and  
20  
21 173 blood pressure), fasting blood draw and assessment of atherosclerotic disease by non-invasive  
22  
23 174 vascular imaging tests (2D/3DVUS and CCTA). Participants may undergo an unscheduled  
24  
25 175 clinical visit if the patient suffers a worsening of the psoriasis. This visit includes a clinical  
26  
27 176 interview, physical examination (height, weight, waist circumference and blood pressure) and  
28  
29 177 fasting blood draw. Imaging studies will not be repeated due to CCTA radiation. Training sessions  
30  
31 178 and certification of all personnel involved in data collection are repeated throughout the study.  
32  
33 179 Inclusion started in January 2020 with baseline visits completed for all 120 patients by the end of  
34  
35 180 2022. The remaining 1-year follow up visits are expected to be completed by the end of 2023  
36  
37 181 (Figure 2).

## 41 182 **CLINICAL INTERVIEW: CVRFS, DIET AND LIFESTYLE HABITS**

43 183 Regarding CVRFS, patients are assessed for diabetes mellitus, hypertension, hyperlipidemia  
44  
45 184 obesity, smoking, metabolic syndrome and sedentary lifestyle (19). To assess the impact of the  
46  
47 185 Mediterranean diet on the CV risk in patients with psoriasis, a questionnaire from the PREDIMED  
48  
49 186 (Prevention with Mediterranean Diet) study is used. This is a validated tool that assesses the  
50  
51 187 degree of adherence to the Mediterranean dietary pattern with 14 simple questions (20). In order  
52  
53 188 to measure the impact of psoriasis on patients' daily activities, the Dermatology Life Quality Index  
54  
55 189 (DLQI) questionnaire is employed (21). It is a unidimensional scale consisting of a short, simple  
56  
57 190 and easy-to-complete 10-question self-administered questionnaire. The questions are related to  
58  
59  
60

1  
2  
3 191 the perception of the impact of the skin disease on quality of life in the last week. All  
4  
5 192 questionnaires are provided at all visits.  
6  
7

### 8 193 **VASCULAR IMAGING STUDIES**

9  
10 194 Carotid and femoral arteries are explored using 2DVUS and 3DVUS (Figure 3). Staff performing  
11  
12 195 and interpreting the images are blinded to the variables of the study and any other imaging  
13  
14 196 procedures. A Philips iU22® ultrasound system (Philips Healthcare Andover, MA), using a 2D  
15  
16 197 L9-3 MHz high-resolution linear transducer is employed for 2VUS image acquisition. The study  
17  
18 198 protocol includes cross-sectional and longitudinal views of both carotid and femoral arteries to  
19  
20 199 detect plaques and standardized longitudinal views for intima-media thickness measurements.  
21  
22 200 2DVUS images will be analyzed using QLAB software (Intellispace Portal, Philips Healthcare).  
23  
24 201 2DVUS analysis includes assessment of carotid and femoral IMT (values >0.9 mm will be  
25  
26 202 considered abnormal), the presence and extension of atherosclerotic plaques in the carotid and  
27  
28 203 femoral territories (plaques are defined as a focal protrusion into the arterial lumen of thickness  
29  
30 204 >0.5 mm or >50% of the surrounding IMT or a diffuse thickness >1.5 mm measured between the  
31  
32 205 media-adventitia and intima-lumen interfaces), maximal plaque thickness (maximal distance  
33  
34 206 between the plaque-lumen and the plaque-adventitia interfaces), and plaque stenosis severity  
35  
36 207 (significant stenosis will be considered when luminal narrowing is >50%) (22).  
37  
38  
39

40  
41 208 A Philips iU22® ultrasound system equipped with a VL13-5 2D/3D volume linear array  
42  
43 209 transducer (Philips Healthcare) is used for the 3DVUS protocol. The acquisition protocol for the  
44  
45 210 carotid arteries consists of a 30° automatic sweep (explored vessel segment =6 cm long) centered  
46  
47 211 at the carotid bulb to include the distal common carotid artery, the bulb, the bifurcation, and the  
48  
49 212 proximal internal and external carotid artery segments. For the femoral arteries, acquisition is  
50  
51 213 centered at the bifurcation and includes the mid-distal common femoral artery, the bifurcation,  
52  
53 214 and the proximal superficial and deep femoral artery segments. Images will be analyzed using the  
54  
55 215 Vascular Plaque Quantification (VPQ) feature of QLAB software (Intellispace Portal, Philips).  
56  
57 216 The 3D variables quantified include: plaque volume, which will be determined by measuring the  
58  
59 217 volumes of each atherosclerotic plaque visualized in the standardized 3D acquisition of each  
60

1  
2  
3 218 carotid and femoral artery individually as well as their sum, number of plaques by vascular site  
4  
5 219 and participant and 3D vessel wall volume or burden, as the plaque volume between the outer and  
6  
7 220 inner wall boundaries (12).  
8  
9

## 10 **CORONARY IMAGING STUDIES**

11  
12  
13 222 CCTA is performed with a 320-detector CT scanner (Aquilion ONE VISION, Toshiba, Japan) at  
14  
15 223 the Hospital Universitario HM Sanchinarro in Madrid, following the guidelines of the NIH  
16  
17 224 Radiation Exposure Committee. Scans are performed with prospective or retrospective EKG  
18  
19 225 gating according to heart rate, tube potential of 100 or 120 kV, tube current of 100-850mA  
20  
21 226 adjusted to the patient's body size, with a gantry rotation time of 275 ms. Images are being  
22  
23 227 acquired with a slice thickness of 0.5 mm and a slice increment of 0.25 mm. Patient  
24  
25 228 characteristics, such as date of visit and treatment, will not be considered when reading the scans.  
26  
27 229 Coronary plaque quantification and characteristics will be analyzed in each of the main coronary  
28  
29 230 arteries (with a diameter >2 mm) using specific software (QAngio CT, Medis; The Netherlands)  
30  
31 231 (4,23). Automated longitudinal contouring of the inner lumen and outer wall will be performed,  
32  
33 232 manually adjusting the results when there are clear deviations. Results of the automated  
34  
35 233 contouring will also be reviewed on transverse reconstructed cross-sections of the artery on a  
36  
37 234 section-by-section basis at 0.25-mm increments. Lumen attenuation will be adaptively corrected  
38  
39 235 for each scan using gradient filters and intensity values within the artery.  
40  
41  
42  
43 236 Plaque volume (in cubic millimeters) will be divided by the corresponding segment length (in  
44  
45 237 millimeters), to obtain a plaque index to take into account variable coronary artery lengths. Total  
46  
47 238 plaque burden is defined as the sum of calcified plaque burden and non-calcified plaque burden  
48  
49 239 (NCB), assessed in square millimeters. Non-calcified plaque volume and subcomponents will be  
50  
51 240 obtained after adaptively correcting for lumen attenuation and represented as a function of the  
52  
53 241 software-derived Hounsfield units as previously described (24). Also, high-risk plaque features,  
54  
55 242 defined as positive remodeling (remodeling index > 1.10), low-attenuation (<30 HU), or spotty  
56  
57 243 calcification will be evaluated.  
58  
59  
60

1  
2  
3 244 All CCTA images will be analyzed in the Advanced Cardiac Imaging Unit at HM Sanchinarro,  
4  
5 245 Madrid, and in The Laboratory of Inflammation and Cardiometabolic Diseases, National Heart,  
6  
7 246 Lung and Blood Institute (Maryland, United States) for specific analysis. Figure 4 shows an  
8  
9 247 example of coronary arteries with (green arrow) and without subclinical atherosclerosis by CCTA.

## 11 12 248 **PHYSICAL EXAMINATION, LABORATORY ANALYSIS AND BIOBANKING**

13  
14  
15 249 Patients undergo basic clinical studies in which they are weighed, measured, have their blood  
16  
17 250 pressure taken and their waist circumference measured. Moreover, fasting blood samples are  
18  
19 251 collected at baseline, 1-year follow-up and flare-up visits as part of the clinical process. We will  
20  
21 252 collect data of the results of the analysis of serum glucose, uric acid, alkaline phosphatase,  
22  
23 253 bilirubin, apolipoprotein A1, apolipoprotein B, triglycerides, GlycA, total cholesterol, high-  
24  
25 254 density lipoprotein cholesterol, low-density lipoprotein cholesterol, C-reactive protein, C-reactive  
26  
27 255 protein ultra, lipoprotein (a), haptoglobin, insulin, hemoglobin, lymphocytes, neutrophils,  
28  
29 256 monocytes and leukocytes. In addition, blood samples are collected in each scheduled visit to be  
30  
31 257 processed and stored at -80°C for high-throughput “omics” analysis and biobanking. Each aliquot  
32  
33 258 is assigned a unique identifier by using a laboratory information management system (Bio-e-  
34  
35 259 Bank), managed by the Ramón y Cajal Institute for Health Research (IRYCIS), to ensure adequate  
36  
37 260 tracking of all procedures.

38  
39  
40  
41 261 The proteomic analysis will be performed by qualified personnel from the vascular  
42  
43 262 physiopathology department of the Hospital Nacional de Paraplégicos in Toledo. Building on the  
44  
45 263 previous experience of our group, atherosclerosis in patients with psoriasis will be studied at the  
46  
47 264 molecular level, trying to generate proteomic profiles that will allow us to obtain new data that  
48  
49 265 shed light on this high-risk phenotype, incorporating the most recent advances in post-genomic  
50  
51 266 sciences to identify panels of novel biomarkers that can serve as potential tools in the diagnosis  
52  
53 267 and prognosis of the early phase of atherosclerosis, allowing to improve the primary, or even  
54  
55 268 primordial, preventive strategies for the management of cardiovascular risk in these patients. To  
56  
57 269 this end, the overall proteomic discovery strategy will consist of a discovery phase, a verification  
58  
59 270 phase and a validation phase: (1) The discovery phase will be performed using TMT 10-plex

1  
2  
3 271 reagents, followed by LC-MS/MS using a reverse-phase C-18 nanocolumn. Identification of  
4  
5 272 selected peptides will be performed using the likelihood ratio method (25) and the false discovery  
6  
7 273 rate (FDR) calculated using inverted databases and the refined method (26). Only peptides  
8  
9 274 identified with FDR  $\leq 1\%$  will be used to quantify the relative abundance of each protein from  
10  
11 275 reporter ion intensities. For statistical analysis of quantitative data, the WSPP statistical model  
12  
13 276 will be used (27). Finally, a functional analysis of the whole set of quantified proteins will be  
14  
15 277 performed by analyzing the coordinated protein responses in quantitative proteomics experiments  
16  
17 278 - the systems biology triangle (SBT) (28), which correlates the performance of groups of proteins  
18  
19 279 within a biological process with their quantitative behavior. (2) The verification phase will  
20  
21 280 involve a targeted proteomics strategy to study the proteins and the mechanisms previously  
22  
23 281 described by our group, which possibly could be involved in psoriasis, focusing on their  
24  
25 282 relationship with atherosclerosis and CV risk stratification. (3) The Validation phase will consist  
26  
27 283 of targeted proteomics and immunoassays. The results obtained in the discovery phase will be  
28  
29 284 validated in an independent cohort of patients and will be analyzed for a comprehensive  
30  
31 285 assessment of lipoprotein biomarkers and inflammatory biomarkers. These last two phases will  
32  
33 286 use the Selected reaction monitoring (SRM) methodology – SRM design.

### 37 **CLINICAL EVENTS**

38  
39  
40 288 In addition to these examinations, patients will have their routine hospital visits, during which  
41  
42 289 additional information will be collected on any clinical or health-related events affecting the  
43  
44 290 participants during the study period. In any case, the continuity of the patient in the study will be  
45  
46 291 assessed, as the patient's health status will always be prioritized.

### 49 **STATISTICAL ANALYSIS PLAN**

50  
51  
52 293 EDSAP is a longitudinal cohort study, in which measurements are made of different variables  
53  
54 294 related to psoriasis and cardiovascular imaging at baseline and after one year of biologic  
55  
56 295 treatment. This type of design allows simultaneous testing of different hypotheses, which will  
57  
58 296 involve a specific statistical analysis plan and the selection of the most appropriate data treatment  
59  
60

1  
2  
3 297 and models to study associations and account for potential confounders. On the one hand, cross-  
4  
5 298 sectional studies will be carried out at each visit between the independent variables and the  
6  
7 299 different outcome variables. Analyses will be performed using linear regression models for  
8  
9 300 continuous variables and logistic regression models for categorical variables. On the other hand,  
10  
11 301 longitudinal studies of the progression of subclinical atherosclerosis based on different  
12  
13 302 independent variables will be performed using the most appropriate models for longitudinal data.  
14  
15  
16 303 The non-calcified coronary burden after one year of treatment was considered as the reference  
17  
18 304 variable for the sample size calculation, given its clinical relevance and the existence of previous  
19  
20 305 literature providing reference values (4,16). Accepting an  $\alpha=0.05$  and a  $\beta=0.2$  in a bilateral  
21  
22 306 contrast for repeated (paired) means, a total of 97 subjects are needed to detect a minimum  
23  
24 307 difference of 0.03 mm, a more conservative value than that obtained in previous studies (4,16).  
25  
26 308 We assumed a loss to follow-up rate of 10%. To date, we have recruited a total of 120 patients,  
27  
28 309 far exceeding the minimum sample size needed to detect differences in the primary endpoint.  
29  
30 310 Study results will be reported in accordance with STROBE guidelines (29).  
31  
32  
33

### 311 **PATIENT AND PUBLIC INVOLVEMENT**

312 In this study we have taken into account some considerations of patients in order to understand  
313 their needs and perspectives. Of the latter, we found that one of their main concerns was the  
314 impact of diet on psoriasis. For this reason, we included a questionnaire on adherence to the  
315 Mediterranean diet from the PREDIMED study.  
316  
317  
318  
319  
320  
321



1  
2  
3 322 **DISCUSSION**  
4

5  
6 323 The EDSAP study aims to provide information on the presence and progression of subclinical  
7  
8 324 atherosclerosis in patients with psoriasis in order to help establish earlier and more personalized  
9  
10 325 management of care for these patients, whose life expectancy is reduced due to the increased risk  
11  
12 326 of cardiovascular disease at younger ages compared to the general population.

13  
14  
15 327 Traditional prediction systems based on classical CVRFs, underestimate the actual CV risk of  
16  
17 328 patients with psoriasis and other chronic inflammatory states (30). There is a lack of markers that  
18  
19 329 allow us to adequately predict those patients who will develop cardiovascular disease. In this  
20  
21 330 scenario, numerous publications have emerged in recent highlighting the value of detecting  
22  
23 331 subclinical atherosclerosis through various imaging tests as a tool to overcome this gap. The use  
24  
25 332 of ultrasound techniques has shown to be an accurate biomarker of atherosclerosis presence (4).  
26  
27 333 Screening for subclinical atherosclerosis in patients with psoriasis with imaging techniques in  
28  
29 334 more than one vascular territory, such as the carotid and especially the femoral arteries, has proven  
30  
31 335 to be a reliable biomarker for cardiovascular risk assessment (12). In addition, 3DVUS is another  
32  
33 336 well-established imaging technique for quantifying early carotid and femoral atherosclerotic  
34  
35 337 burden, as well as being an accessible, novel and reliable technique (13). Recently, this technique  
36  
37 338 has been further developed to obtain plaque characterization and quantification, enabling risk  
38  
39 339 stratification based on atherosclerotic plaque burden (16). Regarding CCTA, some studies have  
40  
41 340 shown how biologics can modulate coronary plaque indices in psoriasis favorably, supporting  
42  
43 341 further studies to qualify these results (16,18). These results have been recently validated in a  
44  
45 342 systematic review and meta-analysis evaluating the impact of licensed biologic treatments on  
46  
47 343 blood and imaging biomarkers of CV risk in adult patients with psoriasis. The results  
48  
49 344 demonstrated how some biologic drugs were associated with a reduction in aortic vascular  
50  
51 345 inflammation (31). The EDSAP study is the first study that aims to have a comprehensive CV  
52  
53 346 overview of the psoriasis patient, using novel imaging techniques to study peripheral and coronary  
54  
55 347 subclinical atherosclerosis to accurately assess individual CV risk and minimize this risk through  
56  
57 348 prevention and early treatment. This global understanding of the disease, and the ability to see  
58  
59  
60



1  
2  
3 349 how antipsoriatic therapies modulate the patient's internal inflammation, may represent a  
4  
5 350 breakthrough in the treatment of the psoriasis patient, as well as in the understanding of psoriasis  
6  
7 351 as a human model of atherosclerosis in inflammatory states.  
8  
9

10 352 As a complement to multiterritorial imaging studies, EDSAP incorporates the use of new  
11  
12 353 molecular techniques such as proteomics that could be the starting point to identify those  
13  
14 354 individuals potentially predisposed to develop atherosclerosis, allowing us to find potential  
15  
16 355 predictive and therapeutic targets. At present, few studies have evaluated the usefulness of  
17  
18 356 proteomic strategies to identify a biomarker of atherosclerosis in patients with psoriasis (32,33).  
19  
20 357 This approach aims to identify early markers of subclinical atherosclerosis that can, alone or in  
21  
22 358 combination with imaging techniques, identify individuals at increased risk. The biological  
23  
24 359 resource generated will also be available for future use in longitudinal association studies of any  
25  
26 360 parameter of interest (e.g. clinical events, response to treatment, development of risk factors,  
27  
28 361 progression of atherosclerosis, etc.), which will advance the understanding of how CV disease  
29  
30 362 initiates and progresses.  
31  
32  
33

34 363 The main methodological advantages of this study are the strict application of protocols, the  
35  
36 364 collection of biobank samples and the prospective data collection which allows to evaluate the  
37  
38 365 impact of anti-inflammatory therapies on atheroma plaque presence and characterization. In  
39  
40 366 addition, state-of-the-art scientific techniques are being applied to measure the anatomical and  
41  
42 367 biological characteristics of subclinical atherosclerosis. However, there are limitations to be kept  
43  
44 368 in mind: this is an observational study and more vulnerable to potential confounding factors  
45  
46 369 compared to randomized controlled trials, and the open, non-randomized use of psoriasis  
47  
48 370 treatments in a small sample and with a short follow-up duration. However, this could be the  
49  
50 371 largest consecutive sample of psoriasis patients followed over time using CCTA, 3D and 2DVUS.  
51  
52 372 In addition, we will follow a consecutive sample to minimize any selection bias in longitudinal  
53  
54 373 follow-up. Finally, we will use arterial plaque imaging technology to understand modulation in  
55  
56 374 CV disease risk secondary to biological treatment.  
57  
58  
59  
60

1  
2  
3 375 In conclusion, the EDSAP study is designed to study psoriasis as a model of atherosclerosis in  
4  
5 376 inflammatory states, as well as to provide clinical, imaging and molecular biomarkers, using  
6  
7 377 innovative imaging techniques as well as omics technologies for the prevention and treatment of  
8  
9 378 these high-risk patients for early CV events.  
10

11  
12 379 **Ethics and dissemination of results:**  
13

14  
15 380 The study protocol has been approved by the Ethics Committee of Hospital Ramón y Cajal in  
16  
17 381 Madrid. All participants will provide written informed consent that explicitly includes consent for  
18  
19 382 biobanking of surplus biological materials, which will be provided for future research projects.  
20  
21 383 We will present our findings at national and international congresses, and peer-reviewed journals.  
22

23  
24 384 **Acknowledgements:**  
25

26  
27 385 We thank all the participants in the study and gratefully acknowledge the collaboration and  
28  
29 386 assistance of the staff at Hospital Universitario Ramón y Cajal, Hospital HM Sanchinarro,  
30  
31 387 National Institute of Health, Hospital 12 de Octubre and Atria Clinic.  
32

33  
34 388 We would also like to thank the dedication and impeccable management of the biological samples  
35  
36 389 to all the members of the Biobank of the Hospital Ramón y Cajal. Finally, we are very grateful to  
37  
38 390 all the participants in the EDSAP study, without them it would not have been possible.  
39

40  
41 391 **Data Availability statement:**  
42

43  
44 392 Our data will be published in a timely manner at the conclusion of the follow-up period and will  
45  
46 393 be made available upon request.  
47

48  
49 394  
50  
51  
52  
53  
54  
55  
56  
57  
58  
59  
60

1  
2  
3 395 **REFERENCES**

- 4  
5 396 1. Griffiths CE, Barker JN. Pathogenesis and clinical features of psoriasis. *Lancet Lond Engl*.  
6  
7 397 2007 Jul 21;370(9583):263–71.
- 8  
9  
10 398 2. Neimann AL, Shin DB, Wang X, Margolis DJ, Troxel AB, Gelfand JM. Prevalence of  
11  
12 399 cardiovascular risk factors in patients with psoriasis. *J Am Acad Dermatol*. 2006 Nov  
13  
14 400 1;55(5):829–35.
- 15  
16  
17 401 3. Risk of Myocardial Infarction in Patients With Psoriasis | Acute Coronary Syndromes |  
18  
19 402 JAMA | JAMA Network [Internet]. [cited 2022 Nov 30]. Available from:  
20  
21 403 <https://jamanetwork.com/journals/jama/fullarticle/203598>
- 22  
23  
24 404 4. Lerman JB, Joshi AA, Chaturvedi A, Aberra TM, Dey AK, Rodante JA, et al. Coronary  
25  
26 405 Plaque Characterization in Psoriasis Reveals High-Risk Features That Improve After  
27  
28 406 Treatment in a Prospective Observational Study. *Circulation*. 2017 Jul 18;136(3):263–76.
- 29  
30  
31 407 5. Garshick MS, Barrett TJ, Wechter T, Azarchi S, Scher JU, Neimann A, et al.  
32  
33 408 Inflammasome Signaling and Impaired Vascular Health in Psoriasis. *Arterioscler Thromb*  
34  
35 409 *Vasc Biol*. 2019 Apr;39(4):787–98.
- 36  
37  
38  
39 410 6. Potential Immunological Links Between Psoriasis and Cardiovascular Disease - PubMed  
40  
41 411 [Internet]. [cited 2022 Dec 6]. Available from: <https://pubmed.ncbi.nlm.nih.gov/29910818/>
- 42  
43  
44 412 7. Mehta NN, Krishnamoorthy P, Yu Y, Khan O, Raper A, Van Voorhees A, et al. The impact  
45  
46 413 of psoriasis on 10-year Framingham risk. *J Am Acad Dermatol*. 2012 Oct;67(4):796–8.
- 47  
48  
49 414 8. Gonzalez-Cantero A, Gonzalez-Cantero J, Sanchez-Moya AI, Perez-Hortet C, Arias-  
50  
51 415 Santiago S, Schoendorff-Ortega C, et al. Subclinical atherosclerosis in psoriasis. Usefulness  
52  
53 416 of femoral artery ultrasound for the diagnosis, and analysis of its relationship with insulin  
54  
55 417 resistance. *PloS One*. 2019;14(2):e0211808.
- 56  
57  
58  
59  
60

- 1  
2  
3 418 9. Armstrong AW, Harskamp CT, Ledo L, Rogers JH, Armstrong EJ. Coronary artery disease  
4  
5 419 in patients with psoriasis referred for coronary angiography. *Am J Cardiol*. 2012 Apr  
6  
7 420 1;109(7):976–80.  
8  
9  
10 421 10. Mansouri B, Kivelevitch D, Natarajan B, Joshi AA, Ryan C, Benjegerdes K, et al.  
11  
12 422 Comparison of Coronary Artery Calcium Scores Between Patients With Psoriasis and Type  
13  
14 423 2 Diabetes. *JAMA Dermatol*. 2016 Nov 1;152(11):1244–53.  
15  
16  
17 424 11. Fernández-Friera L, Peñalvo JL, Fernández-Ortiz A, Ibañez B, López-Melgar B, Laclaustra  
18  
19 425 M, et al. Prevalence, Vascular Distribution, and Multiterritorial Extent of Subclinical  
20  
21 426 Atherosclerosis in a Middle-Aged Cohort: The PESA (Progression of Early Subclinical  
22  
23 427 Atherosclerosis) Study. *Circulation*. 2015 Jun 16;131(24):2104–13.  
24  
25  
26  
27 428 12. González-Cantero A, Gonzalez-Cantero J, Sanchez-Moya AI, Perez-Hortet C, Arias-  
28  
29 429 Santiago S, Martin-Rodriguez JL, et al. Femoral artery ultrasound for improving the  
30  
31 430 detection of atherosclerosis in psoriasis. *J Am Acad Dermatol*. 2019 Mar;80(3):784–6.  
32  
33  
34  
35 431 13. López-Melgar B, Fernández-Friera L, Oliva B, García-Ruiz JM, Peñalvo JL, Gómez-  
36  
37 432 Talavera S, et al. Subclinical Atherosclerosis Burden by 3D Ultrasound in Mid-Life: The  
38  
39 433 PESA Study. *J Am Coll Cardiol*. 2017 Jul 18;70(3):301–13.  
40  
41  
42 434 14. Kaur S, Kingo K, Zilmer M. Psoriasis and Cardiovascular Risk—Do Promising New  
43  
44 435 Biomarkers Have Clinical Impact? *Mediators Inflamm*. 2017;2017:7279818.  
45  
46  
47 436 15. 2019 ESC/EAS Guidelines for the management of dyslipidaemias: lipid modification to  
48  
49 437 reduce cardiovascular risk | *European Heart Journal* | Oxford Academic [Internet]. [cited  
50  
51 438 2022 Dec 13]. Available from:  
52  
53 439 <https://academic.oup.com/eurheartj/article/41/1/111/5556353>  
54  
55  
56  
57  
58  
59  
60

- 1  
2  
3 440 16. Elnabawi YA, Dey AK, Goyal A, Groenendyk JW, Chung JH, Belur AD, et al. Coronary  
4  
5 441 artery plaque characteristics and treatment with biologic therapy in severe psoriasis: results  
6  
7 442 from a prospective observational study. *Cardiovasc Res*. 2019 Mar 15;115(4):721–8.  
8  
9  
10 443 17. López-Melgar B, Mass V, Nogales P, Sánchez-González J, Entrekin R, Collet-Billon A, et  
11  
12 444 al. New 3-Dimensional Volumetric Ultrasound Method for Accurate Quantification of  
13  
14 445 Atherosclerotic Plaque Volume. *JACC Cardiovasc Imaging*. 2022 Jun 1;15(6):1124–35.  
15  
16  
17 446 18. Elnabawi YA, Dey AK, Mehta NN. Emerging Applications of Coronary CT Angiography  
18  
19 447 in Coronary Heart Disease: Getting Better with Time. *Eur Heart J*. 2018 Nov  
20  
21 448 1;39(41):3682–4.  
22  
23  
24 449 19. Hu SCS, Lan CCE. Psoriasis and Cardiovascular Comorbidities: Focusing on Severe  
25  
26 450 Vascular Events, Cardiovascular Risk Factors and Implications for Treatment. *Int J Mol*  
27  
28 451 *Sci*. 2017 Oct 21;18(10):2211.  
29  
30  
31  
32 452 20. Estruch R, Ros E, Salas-Salvadó J, Covas MI, Corella D, Arós F, et al. Primary Prevention  
33  
34 453 of Cardiovascular Disease with a Mediterranean Diet Supplemented with Extra-Virgin  
35  
36 454 Olive Oil or Nuts. *N Engl J Med*. 2018 Jun 21;378(25):e34.  
37  
38  
39 455 21. Finlay AY, Khan GK. Dermatology Life Quality Index (DLQI)--a simple practical measure  
40  
41 456 for routine clinical use. *Clin Exp Dermatol*. 1994 May;19(3):210–6.  
42  
43  
44 457 22. Touboul PJ, Hennerici MG, Meairs S, Adams H, Amarenco P, Desvarieux M, et al.  
45  
46 458 Mannheim Intima-Media Thickness Consensus. *Cerebrovasc Dis*. 2004;18(4):346–9.  
47  
48  
49 459 23. Kwan AC, May HT, Cater G, Sibley CT, Rosen BD, Lima JAC, et al. Coronary artery  
50  
51 460 plaque volume and obesity in patients with diabetes: the factor-64 study. *Radiology*. 2014  
52  
53 461 Sep;272(3):690–9.  
54  
55  
56  
57  
58  
59  
60

- 1  
2  
3 462 24. Sorokin AV, Patel N, Abdelrahman KM, Ling C, Reimund M, Graziano G, et al. Complex  
4  
5 463 association of apolipoprotein E-containing HDL with coronary artery disease burden in  
6  
7 464 cardiovascular disease. *JCI Insight*. 7(10):e159577.  
8  
9  
10 465 25. Martínez-Bartolomé S, Navarro P, Martín-Maroto F, López-Ferrer D, Ramos-Fernández A,  
11  
12 466 Villar M, et al. Properties of average score distributions of SEQUEST: the probability ratio  
13  
14 467 method. *Mol Cell Proteomics MCP*. 2008 Jun;7(6):1135–45.  
15  
16  
17 468 26. Navarro P, Vázquez J. A refined method to calculate false discovery rates for peptide  
18  
19 469 identification using decoy databases. *J Proteome Res*. 2009 Apr;8(4):1792–6.  
20  
21  
22  
23 470 27. García-Marqués F, Trevisan-Herraz M, Martínez-Martínez S, Camafeita E, Jorge I, Lopez  
24  
25 471 JA, et al. A Novel Systems-Biology Algorithm for the Analysis of Coordinated Protein  
26  
27 472 Responses Using Quantitative Proteomics. *Mol Cell Proteomics MCP*. 2016  
28  
29 473 May;15(5):1740–60.  
30  
31  
32 474 28. Isern J, Martín-Antonio B, Ghazanfari R, Martín AM, López JA, del Toro R, et al. Self-  
33  
34 475 renewing human bone marrow mesenspheres promote hematopoietic stem cell expansion.  
35  
36 476 *Cell Rep*. 2013 May 30;3(5):1714–24.  
37  
38  
39 477 29. von Elm E, Altman DG, Egger M, Pocock SJ, Gøtzsche PC, Vandenbroucke JP, et al. The  
40  
41 478 Strengthening the Reporting of Observational Studies in Epidemiology (STROBE)  
42  
43 479 Statement: guidelines for reporting observational studies. *Int J Surg Lond Engl*. 2014  
44  
45 480 Dec;12(12):1495–9.  
46  
47  
48  
49 481 30. Gonzalez-Cantero A, Reddy AS, Dey AK, Gonzalez-Cantero J, Munger E, Rodante J, et al.  
50  
51 482 Underperformance of clinical risk scores in identifying imaging-based high cardiovascular  
52  
53 483 risk in psoriasis: results from two observational cohorts. *Eur J Prev Cardiol*. 2022 Mar  
54  
55 484 30;29(4):591–8.  
56  
57  
58  
59  
60

- 1  
2  
3 485 31. González-Cantero A, Ortega-Quijano D, Álvarez-Díaz N, Ballester MA, Jimenez-Gomez  
4  
5 486 N, Jaen P, et al. Impact of Biological Agents on Imaging and Biomarkers of Cardiovascular  
6  
7 487 Disease in Patients with Psoriasis: A Systematic Review and Meta-Analysis of Randomized  
8  
9 488 Placebo-Controlled Trials. *J Invest Dermatol.* 2021 Oct;141(10):2402–11.  
10  
11  
12 489 32. Kaiser H, Wang X, Kvist-Hansen A, Krakauer M, Gørtz PM, McCauley BD, et al.  
13  
14 490 Biomarkers of subclinical atherosclerosis in patients with psoriasis. *Sci Rep.* 2021 Nov  
15  
16 491 2;11(1):21438.  
17  
18  
19 492 33. Qi F, Tan Y, Yao A, Yang X, He Y. Psoriasis to Psoriatic Arthritis: The Application of  
20  
21 493 Proteomics Technologies. *Front Med.* 2021;8:681172.  
22  
23  
24

25 494 **Author contributions:**

26  
27 495 Carlota Abbad- Jaime de Aragón.: Investigation, Conceptualization, Methodology, Original draft  
28  
29 496 preparation, Visualization. Emilio Berna-Rico.: Conceptualization, Methodology, Visualization,  
30  
31 497 Writing- Reviewing and Editing. María Asunción Ballester-Martinez.: Writing- Reviewing and  
32  
33 498 Editing. Pedro Jaén.: Writing- Reviewing and Editing. Jorge Solís.: Writing- Reviewing and  
34  
35 499 Editing. María G. Barderas.: Software, Validation. Leticia Fernández- Frieria.: Writing-  
36  
37 500 Reviewing and Editing. Nehal N Mehta.: Writing- Reviewing and Editing. Joel M Gelfand.:  
38  
39 501 Writing- Reviewing and Editing. Álvaro González-Cantero.: Conceptualization, Methodology,  
40  
41 502 Writing- Reviewing and Editing, Funding acquisition, Supervision.  
42  
43  
44

45 503 **Funding statement:**

46  
47 504 The EDSAP study is funded by competitive independent grants from the *Instituto de Salud Carlos*  
48  
49 505 *III* and the National Psoriasis Foundation and also by non-competitive investigator-initiated  
50  
51 506 studies (Leo-Pharma, Almirall and Amgen).  
52  
53  
54

55 507

56 508

1  
2  
3 509 **Competing interests statement:**  
4

5  
6 510 NNM is a full- time US government employee and has served as a consultant for several  
7  
8 511 pharmaceutical companies, receiving grants and/or research funding; and as a principal  
9  
10 512 investigator for the NIH receiving grants and/or research funding. JMG served as a consultant for  
11  
12 513 several pharmaceutical companies, receiving honoraria and research grants (to the Trustees of the  
13  
14 514 University of Pennsylvania). JMG is a co-patent holder of resiquimod for treatment of cutaneous  
15  
16 515 T cell lymphoma. JMG receives honoraria from multiple organisms, for being a Deputy Editor  
17  
18 516 for the Journal of Investigative Dermatology, Chief Medical Editor for Healio Psoriatic Disease.  
19  
20 517 He is also a member of the Board of Directors for the International Psoriasis Council, receiving  
21  
22 518 no honoraria. ACG has served as a consultant for several pharmaceutical companies receiving  
23  
24 519 grants/other payments. MABM has served as a consultant for several pharmaceutical companies  
25  
26 520 receiving honoraria. LFF, JS, EBR, MGB, PJ, CAJ have no interests to disclose.  
27  
28  
29

30 521  
31  
32  
33  
34  
35  
36  
37  
38  
39  
40  
41  
42  
43  
44  
45  
46  
47  
48  
49  
50  
51  
52  
53  
54  
55  
56  
57  
58  
59  
60



**Figure 1. EDSAP study flow. CCTA, coronary computed tomography angiography. 2D, 2-dimensional. 3D, 3-dimensional.**

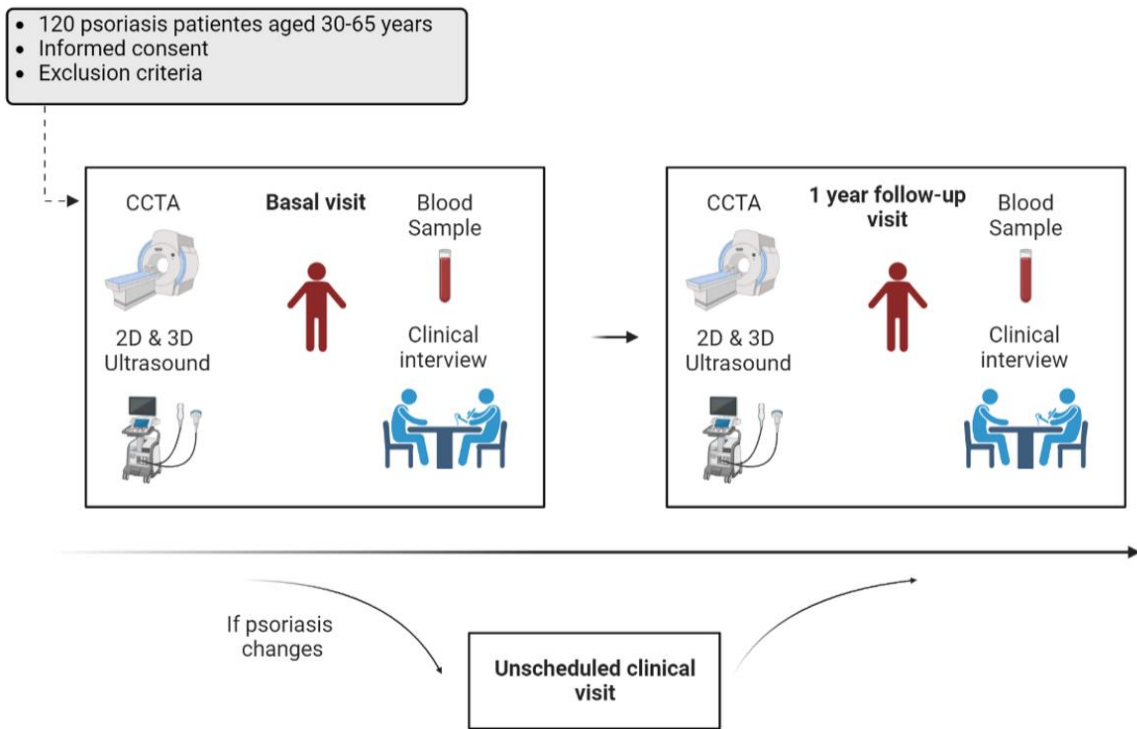

**Figure 2. Participant timeline.** This flow diagram illustrates the participant timeline including enrollment, baseline and 1-year follow up visits, the analysis of data and publication of results.

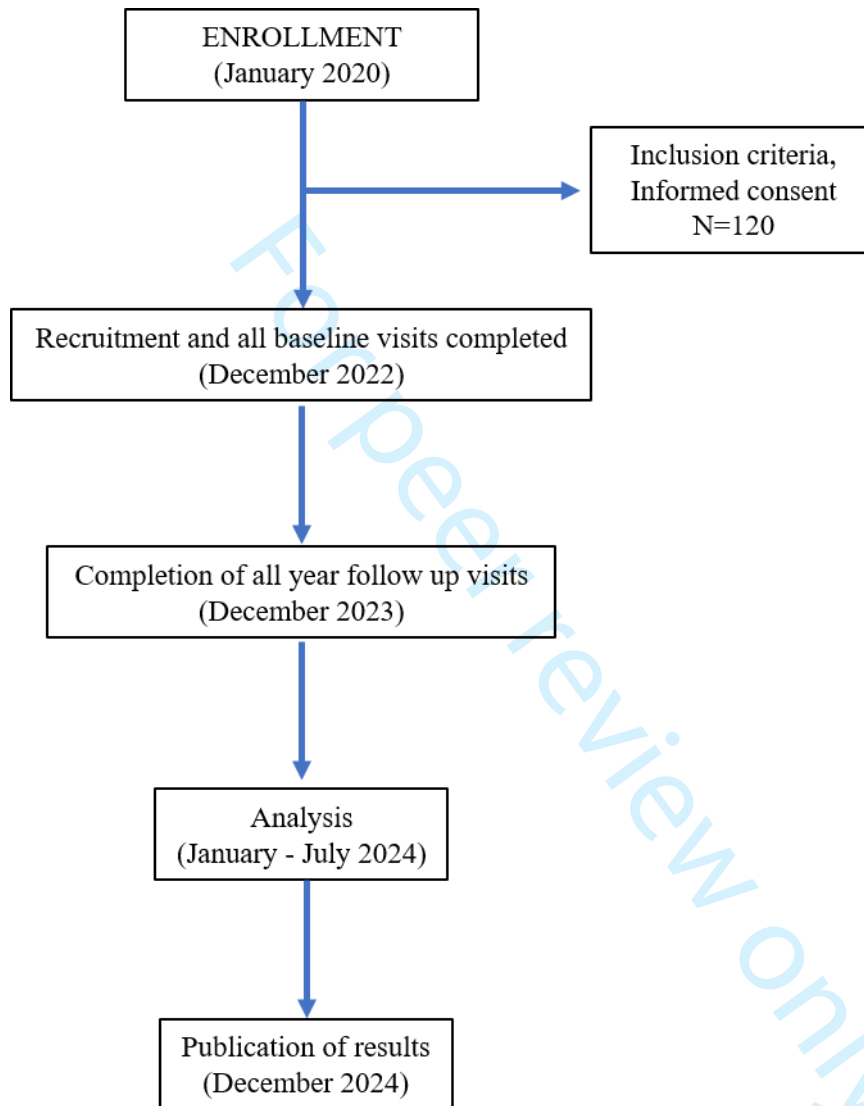

1  
2  
3 **Figure 3. 2D vascular ultrasound of atherosclerotic plaque (white arrow) in the right**  
4 **femoral artery and (A) and 3D vascular ultrasound of another atherosclerotic plaque (black**  
5 **arrow).**  
6  
7  
8  
9

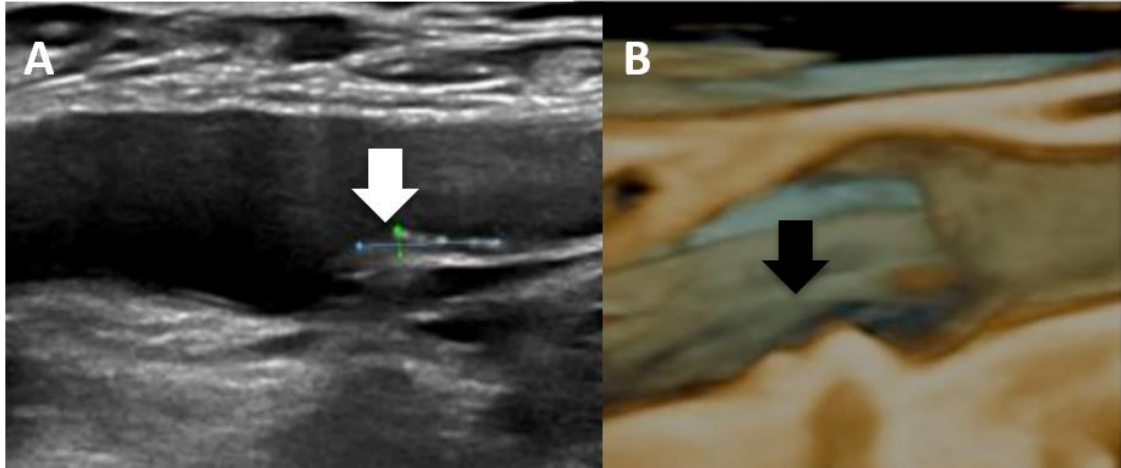

1  
2  
3 **Figure 4. Left anterior descending coronary artery with (green arrow) and without**  
4 **atheroma plaque by CCTA.**  
5  
6  
7

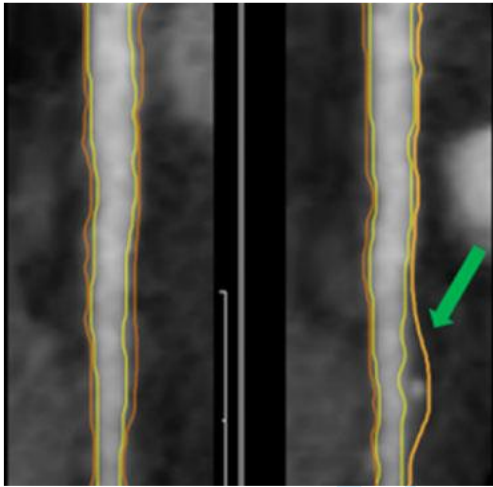

# BMJ Open

## The Early Detection and Progression of Subclinical Atherosclerosis in Psoriasis (EDSAP): Protocol for an observational, single-center, prospective cohort study.

|                                 |                                                                                                                                                                                                                                                                                                                                                                                                                                                                                                                                                                                                                                                                                                                                                                                                                                                                                                                                                                                                                                                  |
|---------------------------------|--------------------------------------------------------------------------------------------------------------------------------------------------------------------------------------------------------------------------------------------------------------------------------------------------------------------------------------------------------------------------------------------------------------------------------------------------------------------------------------------------------------------------------------------------------------------------------------------------------------------------------------------------------------------------------------------------------------------------------------------------------------------------------------------------------------------------------------------------------------------------------------------------------------------------------------------------------------------------------------------------------------------------------------------------|
| Journal:                        | <i>BMJ Open</i>                                                                                                                                                                                                                                                                                                                                                                                                                                                                                                                                                                                                                                                                                                                                                                                                                                                                                                                                                                                                                                  |
| Manuscript ID                   | bmjopen-2023-072455.R1                                                                                                                                                                                                                                                                                                                                                                                                                                                                                                                                                                                                                                                                                                                                                                                                                                                                                                                                                                                                                           |
| Article Type:                   | Protocol                                                                                                                                                                                                                                                                                                                                                                                                                                                                                                                                                                                                                                                                                                                                                                                                                                                                                                                                                                                                                                         |
| Date Submitted by the Author:   | 14-Jul-2023                                                                                                                                                                                                                                                                                                                                                                                                                                                                                                                                                                                                                                                                                                                                                                                                                                                                                                                                                                                                                                      |
| Complete List of Authors:       | <p>Abbad- Jaime de Aragón, Carlota; Hospital Universitario Ramon y Cajal, Dermatology<br/>         Berna-Rico, Emilio; Hospital Universitario Ramon y Cajal, Dermatology<br/>         Ballester-Martinez, María Asunción; Hospital Universitario Ramon y Cajal, Dermatology<br/>         Jaén, Pedro; Hospital Universitario Ramon y Cajal, Dermatology<br/>         Solís, Jorge; Hospital Universitario 12 de Octubre, Cardiology; Atria Clinic<br/>         G. Barderas, María; Hospital Nacional de Paraplégicos, IDISCAM. Toledo, Spain, Department of Vascular Physiopathology<br/>         Fernández- Frieria, Leticia ; Atria Clinic; HM Hospitales, Centro Integral de Enfermedades Cardiovasculares HM CIEC<br/>         N Mehta, Nehal; Department of Cardiology,, George Washington Medical Center, Washington D.C, USA<br/>         Gelfand, Joel ; University of Pennsylvania<br/>         González-Cantero, Álvaro; Hospital Universitario Ramon y Cajal, Dermatology; Universidad Francisco de Vitoria, Facultad de Medicina</p> |
| <b>Primary Subject Heading</b>: | Dermatology                                                                                                                                                                                                                                                                                                                                                                                                                                                                                                                                                                                                                                                                                                                                                                                                                                                                                                                                                                                                                                      |
| Secondary Subject Heading:      | Cardiovascular medicine                                                                                                                                                                                                                                                                                                                                                                                                                                                                                                                                                                                                                                                                                                                                                                                                                                                                                                                                                                                                                          |
| Keywords:                       | Psoriasis < DERMATOLOGY, Coronary heart disease < CARDIOLOGY, Computed tomography < RADIOTHERAPY, Ultrasound < RADIOLOGY & IMAGING                                                                                                                                                                                                                                                                                                                                                                                                                                                                                                                                                                                                                                                                                                                                                                                                                                                                                                               |
|                                 |                                                                                                                                                                                                                                                                                                                                                                                                                                                                                                                                                                                                                                                                                                                                                                                                                                                                                                                                                                                                                                                  |

SCHOLARONE™  
Manuscripts

1  
2  
3 **Title:** The Early Detection and Progression of Subclinical Atherosclerosis in Psoriasis (EDSAP):  
4  
5 Protocol for an observational, single-center, prospective cohort study.  
6  
7

8 **Authors:** Carlota Abbad-Jaime de Aragón, MSc<sup>a\*</sup>, Emilio Berna- Rico, MD<sup>a\*</sup>, María Asunción  
9  
10 Ballester-Martinez, MD<sup>a</sup>, Pedro Jaén, MD, PhD<sup>a</sup>, Jorge Solís, MD, PhD<sup>b,c</sup>, María G. Barderas,  
11  
12 PhD<sup>d</sup>, Leticia Fernández- Friera, MD, PhD<sup>c,e</sup>, Nehal N Mehta, MD, MDSCE<sup>f</sup>, Joel M Gelfand,  
13  
14 MD, MDSCE<sup>g</sup>, Álvaro González-Cantero, MD, PhD<sup>a,h</sup>  
15  
16

17 \*These authors contributed equally.  
18  
19

- 20 a. Department of dermatology, Hospital Universitario Ramón y Cajal, IRYCIS. Madrid,  
21  
22 Spain.  
23  
24  
25 b. Department of Cardiology, Hospital Universitario 12 de Octubre. Madrid, Spain.  
26  
27  
28 c. AtriaClinic, Madrid.  
29  
30  
31 d. Department of Vascular Physiopathology, Hospital Nacional de Paraplégicos, IDISCAM.  
32  
33 Toledo, Spain.  
34  
35  
36 e. Centro Integral de Enfermedades Cardiovasculares HM CIEC, HM Hospitales, Madrid,  
37  
38 Spain.  
39  
40  
41 f. Department of Cardiology, George Washington Medical Center, Washington D.C, USA.  
42  
43  
44 g. Department of Biostatistics, Epidemiology & Informatics, Perelman School of Medicine,  
45  
46 University of Pennsylvania, Philadelphia, Pennsylvania, USA; Department of  
47  
48 Dermatology, Perelman School of Medicine, University of Pennsylvania, Philadelphia,  
49  
50 Pennsylvania, USA.  
51  
52  
53 h. Facultad de Medicina, Universidad Francisco de Vitoria, Ctra. Pozuelo-Majadahonda  
54  
55 KM 1.800, 28223 Pozuelo de Alarcón, Spain.  
56  
57  
58  
59  
60

1  
2  
3 25 **Corresponding author:**  
4

5  
6 26 Álvaro González-Cantero.  
7

8  
9 27 Dermatology Department, Ramon y Cajal University Hospital. IRYCIS. Colmenar Viejo km

10  
11 28 9.100, 28034 Madrid, Spain.  
12

13  
14 29 e-mail: alvarogonzalezcantero@gmail.com  
15

16  
17 30 Phone: +34 620 408 898; FAX +3491373508  
18

19 31 **Keywords:**

20  
21  
22 32 Psoriasis; inflammation; cardiovascular disease; vascular imaging; coronary CTA; proteomics.  
23

24  
25 33 **Abstract word count:** 284 words  
26

27  
28 34 **Manuscript word count:** 3.684 words  
29

30  
31 35 **Number of figures:** 4  
32

33 36  
34

35  
36 37  
37

38  
39 38  
40

41  
42 39  
43

44  
45 40  
46

47  
48 41  
49

50  
51 42  
52

53  
54 43  
55

56  
57 44  
58

59  
60 45

1  
2  
3 46 **ABSTRACT**  
4  
5

6 47 **Introduction:** Life expectancy of patients with psoriasis is reduced by 4-5 years due to  
7  
8 48 cardiovascular disease with an increased risk of myocardial infarction at an earlier age compared  
9  
10 49 to general population. This increased risk is independent of traditional cardiovascular risk factors  
11  
12 50 and higher in moderate-to-severe forms of psoriasis. Inflammation may play a key role in the  
13  
14 51 development of atherosclerosis in these patients.  
15  
16

17 52 **Methods and analysis:** A prospective cohort study, Early Detection and Progression of  
18  
19 53 Subclinical Atherosclerosis in Psoriasis (EDSAP), was initiated in January 2020 to investigate  
20  
21 54 the presence and progression of subclinical atherosclerosis in patients with psoriasis. 120 patients  
22  
23 55 aged 30-65 years and eligible for biological treatment have been recruited at Hospital Ramón y  
24  
25 56 Cajal in Madrid, Spain. Patients undergo a baseline visit, and one-year follow up visit after  
26  
27 57 starting biologic therapy. Each visit includes: assessment of cardiovascular risk factors, screening  
28  
29 58 for subclinical atherosclerosis by 2D/3D ultrasound of carotid and femoral arteries, cardiac  
30  
31 59 computed tomography of coronary arteries and blood sampling. All baseline visits were  
32  
33 60 completed by December 2022, and the remaining follow-up visits will be concluded by the end  
34  
35 61 of 2023. The EDSAP study aims to identify new molecular and imaging markers associated with  
36  
37 62 the presence of atherosclerosis and its progression in a chronic inflammatory state such as  
38  
39 63 psoriasis. This has the potential to: (1) help improve primary cardiovascular prevention strategies  
40  
41 64 in these patients; (2) understand the effect of biologic drugs on the cardiovascular system; (3)  
42  
43 65 serve as a model for understanding atherosclerosis in other chronic inflammatory diseases.  
44  
45  
46

47 66 **Ethics and dissemination:** The study protocol has been approved by the Institutional Review  
48  
49 67 Board of the Hospital Ramón y Cajal in Madrid (HIP/CI-BIOB-058-01). We will present our  
50  
51 68 findings at national and international congresses, and peer-reviewed journals.  
52  
53  
54  
55  
56  
57  
58  
59  
60



1  
2  
3 72 **Strengths and limitations**  
4  
5

- 6 73 • Strict application of protocols, the collection of biobank samples and the prospective data  
7  
8 74 collection which allows to evaluate the impact of anti-inflammatory therapies on  
9  
10 75 atheroma plaque characterization and modulation.  
11  
12 76 • The application of state-of-the-art scientific techniques to measure the anatomical and  
13  
14 77 biological characteristics of subclinical atherosclerosis.  
15  
16 78 • Being an observational study, it is more vulnerable to potential confounding factors  
17  
18 79 compared to randomized controlled trials.  
19  
20 80 • The open-label, non-randomized use of psoriasis treatments in a small sample size and  
21  
22 81 with a short follow-up duration.  
23  
24  
25  
26  
27  
28  
29  
30  
31 84  
32  
33  
34  
35  
36  
37  
38  
39  
40  
41  
42  
43  
44  
45  
46  
47  
48  
49  
50  
51  
52  
53  
54  
55  
56  
57  
58  
59  
60

## 85 **INTRODUCTION**

86 Psoriasis is a complex chronic inflammatory and immune-mediated disease of the skin and joints  
87 associated with multiple comorbidities (1,2). The life expectancy of patients with psoriasis is  
88 reduced by 4-5 years due to cardiovascular (CV) disease, and there is an increased risk of  
89 myocardial infarction at an earlier age compared to individuals without the disease (3,4). This  
90 elevated CV risk could be due to systemic inflammation characteristic, especially in the moderate-  
91 to-severe forms of the disease (5,6). Therefore, classical screening methods such as the  
92 Framingham risk score, which is based on classical cardiovascular risk factors (CVRFs), do not  
93 reliably assess the risk of coronary heart disease in patients with psoriasis (4,7,8).

94 Detection of atherosclerosis in its subclinical stage may help to identify strategies to halt the  
95 development of the disease. Many imaging studies in patients with psoriasis assessed subclinical  
96 atherosclerosis in individual vascular territories (4,9–13), but given the systemic nature of  
97 atherosclerosis, a multi-territorial analysis has the potential to provide a more comprehensive  
98 overview of the distribution and burden of atherosclerosis in these patients (14). The natural  
99 history of atherosclerosis involves a prolonged subclinical phase, where the disease is usually  
100 detected only at an advanced stage or after a CV event. Early detection of subclinical  
101 atherosclerosis and adoption of primary prevention measures, including adequate control of  
102 systemic inflammation, may minimise the risk of CV disease in patients with psoriasis. It has  
103 therefore been proposed that these patients should undergo comprehensive screening for  
104 subclinical atherosclerosis (4), a proposal that has arisen from the need to find a non-invasive,  
105 simple and widely available biomarker for its early detection (15).

106 The most widely used and validated technique for screening subclinical atherosclerosis is vascular  
107 ultrasound (VUS), a reproducible, non-invasive technique with no side effects. In the last years,  
108 there has been a particular interest in the study of subclinical atherosclerosis in the femoral  
109 arteries. Studies in healthy adults have shown that femoral plaques are more prevalent than carotid  
110 plaques and are more associated with traditional CVRFs and coronary calcium (15,16), as well as  
111 being an independent predictor of future CV events (14,17). Interestingly, in the PESA study

1  
2  
3 112 (middle-aged participants from the general population), the presence of iliofemoral disease  
4  
5 113 increases the risk of concurrent coronary calcium and is predictive of disease elsewhere (14). In  
6  
7 114 fact, screening femoral arteries with vascular ultrasound has been introduced in current clinical  
8  
9 115 practice guidelines as a risk modifier in individuals at low or moderate risk individuals (18). In  
10  
11 116 this regard, our research group evaluated the usefulness of femoral artery ultrasound for the  
12  
13 117 detection of subclinical atherosclerosis in psoriasis. We observed that screening of femoral  
14  
15 118 plaques improves the detection of subclinical atherosclerosis in these patients, whereas carotid  
16  
17 119 artery scanning was not sufficiently accurate (15,19). Semiautomated 3-dimensional vascular  
18  
19 120 ultrasound (3DVUS) has been proposed as a better method for quantifying peripheral  
20  
21 121 atherosclerotic burden. 3DVUS is a feasible, reproducible and novel imaging technique to  
22  
23 122 quantify early carotid and femoral atherosclerotic burden in large populations. Furthermore, 3D-  
24  
25 123 VUS offers incremental value over the presence of plaque alone in its association with  
26  
27 124 cardiovascular risk (16,20). In the last decade, the advent of coronary computed tomography  
28  
29 125 angiography (CCTA) has emerged as a promising non-invasive tool to assess coronary artery  
30  
31 126 structure over time. It has been proposed that the ability of CCTA to identify and quantify the  
32  
33 127 morphology of high-risk plaques, together with therapy monitoring, will eventually become the  
34  
35 128 cornerstone of treatment personalisation (21).  
36  
37  
38  
39 129 Several studies have shown the potential benefits of biologic therapies on CV disease risk in  
40  
41 130 patients with psoriasis. Biologic therapy in severe psoriasis has been associated with a favourable  
42  
43 131 modulation of coronary plaque indices by CCTA (19,22). These results support the need to  
44  
45 132 expand our knowledge on the potential effects of biologic therapies in atherosclerosis.  
46  
47  
48  
49 133 In addition to imaging techniques, there is a need to discover and validate new molecular markers  
50  
51 134 that have practical value for clinical intervention as well as for identifying and elucidating CV  
52  
53 135 disease processes at the individual level. Therefore, proteomic studies are needed to gain further  
54  
55 136 insights in psoriasis-associated accelerated atherosclerosis in order to obtain a comprehensive  
56  
57 137 overview of this high-risk population.  
58  
59  
60

1  
2  
3 138 This article describes the rationale, aims and methods of the EDSAP study protocol, a longitudinal  
4  
5 139 cohort study to decipher the molecular, imaging and clinical characteristics of this accelerated  
6  
7 140 atherosclerosis phenotype associated with psoriasis and to explore the effect of anti-inflammatory  
8  
9 141 therapies on it.  
10

## 11 12 142 **STUDY OBJECTIVES**

13  
14  
15 143 The objectives of the EDSAP study are: (1) to assess the prevalence, vascular distribution and  
16  
17 144 burden of subclinical atherosclerosis in patients with psoriasis and its relationship with  
18  
19 145 inflammatory biomarkers and CV risk algorithms using 2DVUS of carotid and femoral arteries,  
20  
21 146 3DVUS of carotid and femoral arteries and CCTA; (2) to characterize the composition of  
22  
23 147 atherosclerotic plaques by CCTA and 3D-VUS of the carotid and femoral arteries; (3) to evaluate  
24  
25 148 the effect of different treatments used in psoriasis on the progression and characterisation of  
26  
27 149 subclinical atherosclerosis in different arterial territories assessed by non-invasive imaging  
28  
29 150 techniques; and (4) to characterise the atherosclerosis process in patients with psoriasis using  
30  
31 151 laboratory analysis and "-omics" technologies, as well as to evaluate changes at the molecular  
32  
33 152 level after treatment of the skin disease.  
34  
35

## 36 37 153 **STUDY DESIGN AND POPULATION**

38  
39 154 The EDSAP study is an observational, longitudinal, prospective cohort study that includes  
40  
41 155 psoriasis patients who will undergo a one-year medical follow-up (Figure 1). Recruitment is  
42  
43 156 voluntary among patients attending dermatology consultations at the Hospital Ramón y Cajal,  
44  
45 157 Madrid (Spain).  
46  
47

48 158 The study includes participants aged between 30 to 65 years, diagnosed with psoriasis clinically  
49  
50 159 by an expert physician and deemed suitable for biologic therapy by the investigator. Exclusion  
51  
52 160 criteria are as follows: history of CV disease (myocardial infarction, angina pectoris, peripheral  
53  
54 161 vascular disease, aortic aneurysm, angioplasty, cardiac surgery, atrial fibrillation or any other  
55  
56 162 cardiological condition), current oncological treatment, history of transplantation with active  
57  
58 163 immunosuppressive or immunomodulatory treatment, morbid obesity (body mass index  $\geq 40$   
59  
60

1  
2  
3 164 kg/m<sup>2</sup>), diabetes mellitus, chronic liver disease, chronic kidney disease (glomerular filtration rate  
4  
5 165 <60 mL/min/1.73 m<sup>2</sup>), other chronic inflammatory disease, presence of any pathology that  
6  
7 166 decreases life expectancy to less than 3 years, or any disease or condition that could affect  
8  
9 167 adherence to study procedures. In addition, participants will be excluded if they have had a chest  
10  
11 168 computed tomography (CT) scan in the previous year, are pregnant or breastfeeding.

### 14 169 **DATA COLLECTION**

17 170 Two study visits are scheduled for each participant: at baseline and 1-year follow up. Both of  
18  
19 171 them include a clinical interview, physical examination (height, weight, waist circumference,  
20  
21 172 blood pressure and psoriasis severity through psoriasis area severity index -PASI-), fasting blood  
22  
23 173 draw and assessment of atherosclerotic disease by non-invasive vascular imaging tests  
24  
25 174 (2D/3DVUS and CCTA). Participants may undergo an unscheduled clinical visit if the patient  
26  
27 175 suffers a worsening of the psoriasis. This visit includes a clinical interview, physical examination  
28  
29 176 (height, weight, waist circumference and blood pressure) and fasting blood draw. Imaging studies  
30  
31 177 will not be repeated due to CCTA radiation. Training sessions and certification of all personnel  
32  
33 178 involved in data collection are repeated throughout the study. Inclusion started in January 2020  
34  
35 179 with baseline visits completed for all 120 patients by the end of 2022. The remaining 1-year follow  
36  
37 180 up visits are expected to be completed by the end of 2023 (Figure 2).

### 41 181 **CLINICAL INTERVIEW: PSORIASIS PAST MEDICAL HISTORY, CVRFS, DIET AND**

#### 43 182 **LIFESTYLE HABITS**

45 183 Regarding CVRFS, patients are assessed for diabetes mellitus, hypertension, hyperlipidemia  
46  
47 184 obesity, smoking, metabolic syndrome and sedentary lifestyle (23). To assess the impact of the  
48  
49 185 Mediterranean diet on the CV risk in patients with psoriasis, a questionnaire from the PREDIMED  
50  
51 186 (Prevention with Mediterranean Diet) study is used. This is a validated tool that assesses the  
52  
53 187 degree of adherence to the Mediterranean dietary pattern with 14 simple questions (24). In order  
54  
55 188 to measure the impact of psoriasis on patients' daily activities, the Dermatology Life Quality Index  
56  
57 189 (DLQI) questionnaire is employed (25). It is a unidimensional scale consisting of a short, simple  
58  
59  
60

1  
2  
3 190 and easy-to-complete 10-question self-administered questionnaire. The questions are related to  
4  
5 191 the perception of the impact of the skin disease on quality of life in the last week. All  
6  
7 192 questionnaires are provided at all visits. Patients will also be asked about psoriasis duration,  
8  
9 193 previous disease treatments and psoriasis comorbidities including psoriasis arthritis and intestinal  
10  
11 194 bowel disease.

### 14 195 **VASCULAR IMAGING STUDIES**

17 196 Carotid and femoral arteries are explored using 2DVUS and 3DVUS (Figure 3). Staff performing  
18  
19 197 and interpreting the images are blinded to the variables of the study and any other imaging  
20  
21 198 procedures. A Philips iU22® ultrasound system (Philips Healthcare Andover, MA), using a 2D  
22  
23 199 L9-3 MHz high-resolution linear transducer is employed for 2VUS image acquisition. The study  
24  
25 200 protocol includes cross-sectional and longitudinal views of both carotid and femoral arteries to  
26  
27 201 detect plaques and standardized longitudinal views for intima-media thickness measurements.  
28  
29 202 2DVUS images will be analyzed using QLAB software (Intellispace Portal, Philips Healthcare).  
30  
31 203 2DVUS analysis includes assessment of carotid and femoral IMT (values >0.9 mm will be  
32  
33 204 considered abnormal), the presence and extension of atherosclerotic plaques in the carotid and  
34  
35 205 femoral territories (plaques are defined as a focal protrusion into the arterial lumen of thickness  
36  
37 206 >0.5 mm or >50% of the surrounding IMT or a diffuse thickness >1.5 mm measured between the  
38  
39 207 media-adventitia and intima-lumen interfaces), maximal plaque thickness (maximal distance  
40  
41 208 between the plaque-lumen and the plaque-adventitia interfaces), and plaque stenosis severity  
42  
43 209 (significant stenosis will be considered when luminal narrowing is >50%) (26).

46  
47 210 A Philips iU22® ultrasound system equipped with a VL13-5 2D/3D volume linear array  
48  
49 211 transducer (Philips Healthcare) is used for the 3DVUS protocol. The acquisition protocol for the  
50  
51 212 carotid arteries consists of a 30° automatic sweep (explored vessel segment =6 cm long) centered  
52  
53 213 at the carotid bulb to include the distal common carotid artery, the bulb, the bifurcation, and the  
54  
55 214 proximal internal and external carotid artery segments. For the femoral arteries, acquisition is  
56  
57 215 centered at the bifurcation and includes the mid-distal common femoral artery, the bifurcation,  
58  
59 216 and the proximal superficial and deep femoral artery segments. Images will be analyzed using the

1  
2  
3 217 Vascular Plaque Quantification (VPQ) feature of QLAB software (Intellispace Portal, Philips).  
4  
5 218 The 3D variables quantified include: plaque volume, which will be determined by measuring the  
6  
7 219 volumes of each atherosclerotic plaque visualized in the standardized 3D acquisition of each  
8  
9 220 carotid and femoral artery individually as well as their sum, number of plaques by vascular site  
10  
11 221 and participant and 3D vessel wall volume or burden, as the plaque volume between the outer and  
12  
13 222 inner wall boundaries (12).

### 16 223 **CORONARY IMAGING STUDIES**

18  
19 224 CCTA is performed with a 320-detector CT scanner (Aquilion ONE VISION, Toshiba, Japan) at  
20  
21 225 the Hospital Universitario HM Sanchinarro in Madrid, following the guidelines of the NIH  
22  
23 226 Radiation Exposure Committee. Scans are performed with prospective or retrospective EKG  
24  
25 227 gating according to heart rate, tube potential of 100 or 120 kV, tube current of 100-850mA  
26  
27 228 adjusted to the patient's body size, with a gantry rotation time of 275 ms. Images are being  
28  
29 229 acquired with a slice thickness of 0.5 mm and a slice increment of 0.25 mm. Patient  
30  
31 230 characteristics, such as date of visit and treatment, will not be considered when reading the scans.  
32  
33 231 Coronary plaque quantification and characteristics will be analyzed in each of the main coronary  
34  
35 232 arteries (with a diameter >2 mm) using specific software (QAngio CT, Medis; The Netherlands)  
36  
37 233 (4,27). Automated longitudinal contouring of the inner lumen and outer wall will be performed,  
38  
39 234 manually adjusting the results when there are clear deviations. Results of the automated  
40  
41 235 contouring will also be reviewed on transverse reconstructed cross-sections of the artery on a  
42  
43 236 section-by-section basis at 0.25-mm increments. Lumen attenuation will be adaptively corrected  
44  
45 237 for each scan using gradient filters and intensity values within the artery.  
46  
47  
48  
49 238 Plaque volume (in cubic millimeters) will be divided by the corresponding segment length (in  
50  
51 239 millimeters), to obtain a plaque index to take into account variable coronary artery lengths. Total  
52  
53 240 plaque burden is defined as the sum of calcified plaque burden and non-calcified plaque burden  
54  
55 241 (NCB), assessed in square millimeters. Non-calcified plaque volume and subcomponents will be  
56  
57 242 obtained after adaptively correcting for lumen attenuation and represented as a function of the  
58  
59 243 software-derived Hounsfield units as previously described (28). Also, high-risk plaque features,



1  
2  
3 244 defined as positive remodeling (remodeling index > 1.10), low-attenuation (<30 HU), or spotty  
4  
5 245 calcification will be evaluated.  
6  
7

8 246 All CCTA images will be analyzed in the Advanced Cardiac Imaging Unit at HM Sanchinarro,  
9  
10 247 Madrid, and in The Laboratory of Inflammation and Cardiometabolic Diseases, National Heart,  
11  
12 248 Lung and Blood Institute (Maryland, United States) for specific analysis. Figure 4 shows an  
13  
14 249 example of coronary arteries with (green arrow) and without subclinical atherosclerosis by CCTA.  
15  
16

### 17 250 **PHYSICAL EXAMINATION, LABORATORY ANALYSIS AND BIOBANKING**

18  
19  
20 251 Patients undergo basic clinical studies in which they are weighed, measured, have their blood  
21  
22 252 pressure taken, their waist circumference measured and their PASI evaluated. Moreover, fasting  
23  
24 253 blood samples are collected at baseline, 1-year follow-up and flare-up visits as part of the clinical  
25  
26 254 process. We will collect data of the results of the analysis of serum glucose, uric acid, alkaline  
27  
28 255 phosphatase, bilirubin, apolipoprotein A1, apolipoprotein B, triglycerides, GlycA, total  
29  
30 256 cholesterol, high-density lipoprotein cholesterol, low-density lipoprotein cholesterol, C-reactive  
31  
32 257 protein, C-reactive protein ultra, lipoprotein (a), haptoglobin, insulin, hemoglobin, lymphocytes,  
33  
34 258 neutrophils, monocytes and leukocytes. In addition, blood samples are collected in each scheduled  
35  
36 259 visit to be processed and stored at -80°C for high-throughput “omics” analysis and biobanking.  
37  
38 260 Each aliquot is assigned a unique identifier by using a laboratory information management system  
39  
40 261 (Bio-e-Bank), managed by the Ramón y Cajal Institute for Health Research (IRYCIS), to ensure  
41  
42 262 adequate tracking of all procedures.  
43  
44

45  
46 263 The proteomic analysis will be performed by qualified personnel from the vascular  
47  
48 264 physiopathology department of the Hospital Nacional de Paraplégicos in Toledo. Building on the  
49  
50 265 previous experience of our group, atherosclerosis in patients with psoriasis will be studied at the  
51  
52 266 molecular level, trying to generate proteomic profiles that will allow us to obtain new data that  
53  
54 267 shed light on this high-risk phenotype, incorporating the most recent advances in post-genomic  
55  
56 268 sciences to identify panels of novel biomarkers that can serve as potential tools in the diagnosis  
57  
58 269 and prognosis of the early phase of atherosclerosis, allowing to improve the primary, or even  
59  
60



1  
2  
3 270 primordial, preventive strategies for the management of cardiovascular risk in these patients. To  
4  
5 271 this end, the overall proteomic discovery strategy will consist of a discovery phase, a verification  
6  
7 272 phase and a validation phase: (1) The discovery phase will be performed using TMT 10-plex  
8  
9 273 reagents, followed by LC-MS/MS using a reverse-phase C-18 nanocolumn. Identification of  
10  
11 274 selected peptides will be performed using the likelihood ratio method (29) and the false discovery  
12  
13 275 rate (FDR) calculated using inverted databases and the refined method (30). Only peptides  
14  
15 276 identified with  $FDR \leq 1\%$  will be used to quantify the relative abundance of each protein from  
16  
17 277 reporter ion intensities. For statistical analysis of quantitative data, the WSPP statistical model  
18  
19 278 will be used (31). Finally, a functional analysis of the whole set of quantified proteins will be  
20  
21 279 performed by analyzing the coordinated protein responses in quantitative proteomics experiments  
22  
23 280 - the systems biology triangle (SBT) (32), which correlates the performance of groups of proteins  
24  
25 281 within a biological process with their quantitative behavior. (2) The verification phase will  
26  
27 282 involve a targeted proteomics strategy to study the proteins and the mechanisms previously  
28  
29 283 described by our group, which possibly could be involved in psoriasis, focusing on their  
30  
31 284 relationship with atherosclerosis and CV risk stratification. (3) The Validation phase will consist  
32  
33 285 of targeted proteomics and immunoassays. The results obtained in the discovery phase will be  
34  
35 286 validated in an independent cohort of patients and will be analyzed for a comprehensive  
36  
37 287 assessment of lipoprotein biomarkers and inflammatory biomarkers. These last two phases will  
38  
39 288 use the Selected reaction monitoring (SRM) methodology – SRM design.

### 289 **CLINICAL EVENTS**

290 In addition to these examinations, patients will have their routine hospital visits, during which  
291 additional information will be collected on any clinical or health-related events affecting the  
292 participants during the study period. In any case, the continuity of the patient in the study will be  
293 assessed, as the patient's health status will always be prioritized.

### 294 **STATISTICAL ANALYSIS PLAN**

1  
2  
3 295 EDSAP is a longitudinal cohort study, in which measurements are made of different variables  
4  
5 296 related to psoriasis and cardiovascular imaging at baseline and after one year of biologic  
6  
7 297 treatment. This type of design allows simultaneous testing of different hypotheses, which will  
8  
9 298 involve a specific statistical analysis plan and the selection of the most appropriate data treatment  
10  
11 299 and models to study associations and account for potential confounders. On the one hand, cross-  
12  
13 300 sectional studies will be carried out at each visit between the independent variables and the  
14  
15 301 different outcome variables. Analyses will be performed using linear regression models for  
16  
17 302 continuous variables and logistic regression models for categorical variables. On the other hand,  
18  
19 303 longitudinal studies of the progression of subclinical atherosclerosis based on different  
20  
21 304 independent variables will be performed using the most appropriate models for longitudinal data.  
22  
23  
24  
25 305 The non-calcified coronary burden after one year of treatment was considered as the reference  
26  
27 306 variable for the sample size calculation, given its clinical relevance and the existence of previous  
28  
29 307 literature providing reference values (4,19). Accepting an  $\alpha=0.05$  and a  $\beta=0.2$  in a bilateral  
30  
31 308 contrast for repeated (paired) means, a total of 97 subjects are needed to detect a minimum  
32  
33 309 difference of 0.03 mm, a more conservative value than that obtained in previous studies (4,19).  
34  
35 310 We assumed a loss to follow-up rate of 10%. To date, we have recruited a total of 120 patients,  
36  
37 311 far exceeding the minimum sample size needed to detect differences in the primary endpoint.  
38  
39 312 Study results will be reported in accordance with STROBE guidelines (33).  
40  
41

#### 42 **PATIENT AND PUBLIC INVOLVEMENT**

43  
44  
45 314 None.  
46  
47  
48  
49  
50  
51  
52  
53 317

#### 54 55 318 **DISCUSSION**

56  
57  
58  
59  
60

1  
2  
3 319 The EDSAP study aims to provide information on the presence and progression of subclinical  
4  
5 320 atherosclerosis in patients with psoriasis in order to help establish earlier and more personalized  
6  
7 321 management of care for these patients, whose life expectancy is reduced due to the increased risk  
8  
9 322 of cardiovascular disease at younger ages compared to the general population.  
10

11  
12 323 Traditional prediction systems based on classical CVRFs, underestimate the actual CV risk of  
13  
14 324 patients with psoriasis and other chronic inflammatory states (8,34). There is a lack of markers  
15  
16 325 that allow us to adequately predict those patients who will develop cardiovascular disease. In this  
17  
18 326 scenario, numerous publications have emerged in recent highlighting the value of detecting  
19  
20 327 subclinical atherosclerosis through various imaging tests as a tool to overcome this gap. The use  
21  
22 328 of ultrasound techniques has shown to be an accurate biomarker of atherosclerosis presence (4).  
23  
24 329 Screening for subclinical atherosclerosis in patients with psoriasis with imaging techniques in  
25  
26 330 more than one vascular territory, such as the carotid and especially the femoral arteries, has proven  
27  
28 331 to be a reliable biomarker for cardiovascular risk assessment (15). In addition, 3DVUS is another  
29  
30 332 well-established imaging technique for quantifying early carotid and femoral atherosclerotic  
31  
32 333 burden, as well as being an accessible, novel and reliable technique (16). Recently, this technique  
33  
34 334 has been further developed to obtain plaque characterization and quantification, enabling risk  
35  
36 335 stratification based on atherosclerotic plaque burden (16). Regarding CCTA, some studies have  
37  
38 336 shown how biologics can modulate coronary plaque indices in psoriasis favorably, supporting  
39  
40 337 further studies to qualify these results (19,21,22). These results have been recently validated in a  
41  
42 338 systematic review and meta-analysis evaluating the impact of licensed biologic treatments on  
43  
44 339 blood and imaging biomarkers of CV risk in adult patients with psoriasis. The results  
45  
46 340 demonstrated how some biologic drugs were associated with a reduction in aortic vascular  
47  
48 341 inflammation (35). In this study, one of the interesting aspects to explore, and which could provide  
49  
50 342 more data on the complex relationship between cutaneous and vascular inflammation in these  
51  
52 343 patients, is whether this modulation of coronary plaques by antipsoriatic therapies is parallel to or  
53  
54 344 independent of the improvement in PASI, which would provide a more global view of the  
55  
56 345 systemic inflammation affecting the patient with psoriasis. The EDSAP study is the first study  
57  
58  
59  
60

1  
2  
3 346 that aims to have a comprehensive CV overview of the psoriasis patient, using novel imaging  
4  
5 347 techniques to study peripheral and coronary subclinical atherosclerosis to accurately assess  
6  
7 348 individual CV risk and minimize this risk through prevention and early treatment. This global  
8  
9 349 understanding of the disease, and the ability to see how antipsoriatic therapies modulate the  
10  
11 350 patient's internal inflammation, may represent a breakthrough in the treatment of the psoriasis  
12  
13 351 patient, as well as in the understanding of psoriasis as a human model of atherosclerosis in  
14  
15 352 inflammatory states.

16  
17  
18 353 As a complement to multiterritorial imaging studies, EDSAP incorporates the use of new  
19  
20 354 molecular techniques such as proteomics that could be the starting point to identify those  
21  
22 355 individuals potentially predisposed to develop atherosclerosis, allowing us to find potential  
23  
24 356 predictive and therapeutic targets. At present, few studies have evaluated the usefulness of  
25  
26 357 proteomic strategies to identify a biomarker of atherosclerosis in patients with psoriasis (36,37).  
27  
28 358 This approach aims to identify early markers of subclinical atherosclerosis that can, alone or in  
29  
30 359 combination with imaging techniques, identify individuals at increased risk. The biological  
31  
32 360 resource generated will also be available for future use in longitudinal association studies of any  
33  
34 361 parameter of interest (e.g. clinical events, response to treatment, development of risk factors,  
35  
36 362 progression of atherosclerosis, etc.), which will advance the understanding of how CV disease  
37  
38 363 initiates and progresses.

39  
40  
41  
42 364 The main methodological advantages of this study are the strict application of protocols, the  
43  
44 365 collection of biobank samples and the prospective data collection which allows to evaluate the  
45  
46 366 impact of anti-inflammatory therapies on atheroma plaque presence and characterization. In  
47  
48 367 addition, state-of-the-art scientific techniques are being applied to measure the anatomical and  
49  
50 368 biological characteristics of subclinical atherosclerosis. However, there are limitations to be kept  
51  
52 369 in mind: this is an observational study and more vulnerable to potential confounding factors  
53  
54 370 compared to randomized controlled trials, and the open, non-randomized use of psoriasis  
55  
56 371 treatments in a small sample and with a short follow-up duration. However, this could be the  
57  
58 372 largest consecutive sample of psoriasis patients followed over time using CCTA, 3D and 2DVUS.  
59  
60

1  
2  
3 373 In addition, we will follow a consecutive sample to minimize any selection bias in longitudinal  
4  
5 374 follow-up. Finally, we will use arterial plaque imaging technology to understand modulation in  
6  
7 375 CV disease risk secondary to biological treatment.  
8  
9

10 376 In conclusion, the EDSAP study is designed to study psoriasis as a model of atherosclerosis in  
11  
12 377 inflammatory states, as well as to provide clinical, imaging and molecular biomarkers, using  
13  
14 378 innovative imaging techniques as well as omics technologies for the prevention and treatment of  
15  
16 379 these high-risk patients for early CV events.  
17  
18

19 380 **Ethics and dissemination of results:**

20  
21  
22 381 The study protocol has been approved by the Ethics Committee of Hospital Ramón y Cajal in  
23  
24 382 Madrid. All participants will provide written informed consent that explicitly includes consent for  
25  
26 383 biobanking of surplus biological materials, which will be provided for future research projects.  
27  
28 384 We will present our findings at national and international congresses, and peer-reviewed journals.  
29  
30

31 385 **Acknowledgements:**

32  
33  
34 386 We thank all the participants in the study and gratefully acknowledge the collaboration and  
35  
36 387 assistance of the staff at Hospital Universitario Ramón y Cajal, Hospital HM Sanchinarro,  
37  
38 388 National Institute of Health, Hospital 12 de Octubre and Atria Clinic.  
39

40  
41 389 We would also like to thank the dedication and impeccable management of the biological samples  
42  
43 390 to all the members of the Biobank of the Hospital Ramón y Cajal. Finally, we are very grateful to  
44  
45 391 all the participants in the EDSAP study, without them it would not have been possible.  
46  
47

48 392 **Data Availability statement:**

49  
50 393 Our data will be published in a timely manner at the conclusion of the follow-up period and will  
51  
52 394 be made available upon request.  
53  
54

55 395  
56  
57  
58  
59  
60

**REFERENCES**

1. Griffiths CE, Barker JN. Pathogenesis and clinical features of psoriasis. *Lancet Lond Engl*. 2007 Jul 21;370(9583):263–71.
2. Neimann AL, Shin DB, Wang X, Margolis DJ, Troxel AB, Gelfand JM. Prevalence of cardiovascular risk factors in patients with psoriasis. *J Am Acad Dermatol*. 2006 Nov 1;55(5):829–35.
3. Risk of Myocardial Infarction in Patients With Psoriasis | Acute Coronary Syndromes | JAMA | JAMA Network [Internet]. [cited 2022 Nov 30]. Available from: <https://jamanetwork.com/journals/jama/fullarticle/203598>
4. Lerman JB, Joshi AA, Chaturvedi A, Aberra TM, Dey AK, Rodante JA, et al. Coronary Plaque Characterization in Psoriasis Reveals High-Risk Features That Improve After Treatment in a Prospective Observational Study. *Circulation*. 2017 Jul 18;136(3):263–76.
5. Garshick MS, Barrett TJ, Wechter T, Azarchi S, Scher JU, Neimann A, et al. Inflammasome Signaling and Impaired Vascular Health in Psoriasis. *Arterioscler Thromb Vasc Biol*. 2019 Apr;39(4):787–98.
6. Potential Immunological Links Between Psoriasis and Cardiovascular Disease - PubMed [Internet]. [cited 2022 Dec 6]. Available from: <https://pubmed.ncbi.nlm.nih.gov/29910818/>
7. Mehta NN, Krishnamoorthy P, Yu Y, Khan O, Raper A, Van Voorhees A, et al. The impact of psoriasis on 10-year Framingham risk. *J Am Acad Dermatol*. 2012 Oct;67(4):796–8.
8. Berna-Rico E, Abbad-Jaime de Aragon C, Garcia-Aparicio A, Palacios-Martinez D, Ballester-Martinez A, Carrascosa JM, et al. Cardiovascular Screening Practices and Statin Prescription Habits in Patients with Psoriasis among Dermatologists, Rheumatologists and Primary Care Physicians. *Acta Derm Venereol*. 2023 Mar 28;103:adv5087.
9. Gonzalez-Cantero A, Gonzalez-Cantero J, Sanchez-Moya AI, Perez-Hortet C, Arias-Santiago S, Schoendorff-Ortega C, et al. Subclinical atherosclerosis in psoriasis. Usefulness of femoral artery ultrasound for the diagnosis, and analysis of its relationship with insulin resistance. *PloS One*. 2019;14(2):e0211808.
10. Armstrong AW, Harskamp CT, Ledo L, Rogers JH, Armstrong EJ. Coronary artery disease in patients with psoriasis referred for coronary angiography. *Am J Cardiol*. 2012 Apr 1;109(7):976–80.
11. Mansouri B, Kivelevitch D, Natarajan B, Joshi AA, Ryan C, Benjegerdes K, et al. Comparison of Coronary Artery Calcium Scores Between Patients With Psoriasis and Type 2 Diabetes. *JAMA Dermatol*. 2016 Nov 1;152(11):1244–53.
12. Hjuler KF, Böttcher M, Vestergaard C, Deleuran M, Raaby L, Bøtker HE, et al. Increased Prevalence of Coronary Artery Disease in Severe Psoriasis and Severe Atopic Dermatitis. *Am J Med*. 2015 Dec;128(12):1325–1334.e2.
13. Tinggaard AB, Hjuler KF, Andersen IT, Winther S, Iversen L, Böttcher M. Prevalence and severity of coronary artery disease linked to prognosis in psoriasis and psoriatic arthritis patients: a multi-centre cohort study. *J Intern Med*. 2021 Sep;290(3):693–703.
14. Fernández-Friera L, Peñalvo JL, Fernández-Ortiz A, Ibañez B, López-Melgar B, Laclaustra M, et al. Prevalence, Vascular Distribution, and Multiterritorial Extent of Subclinical



- 1  
2  
3 437 Atherosclerosis in a Middle-Aged Cohort: The PESA (Progression of Early Subclinical  
4 438 Atherosclerosis) Study. *Circulation*. 2015 Jun 16;131(24):2104–13.  
5  
6 439 15. González-Cantero A, Gonzalez-Cantero J, Sanchez-Moya AI, Perez-Hortet C, Arias-  
7 440 Santiago S, Martin-Rodriguez JL, et al. Femoral artery ultrasound for improving the  
8 441 detection of atherosclerosis in psoriasis. *J Am Acad Dermatol*. 2019 Mar;80(3):784–6.  
9  
10 442 16. López-Melgar B, Fernández-Friera L, Oliva B, García-Ruiz JM, Peñalvo JL, Gómez-  
11 443 Talavera S, et al. Subclinical Atherosclerosis Burden by 3D Ultrasound in Mid-Life: The  
12 444 PESA Study. *J Am Coll Cardiol*. 2017 Jul 18;70(3):301–13.  
13  
14 445 17. Kaur S, Kingo K, Zilmer M. Psoriasis and Cardiovascular Risk—Do Promising New  
15 446 Biomarkers Have Clinical Impact? *Mediators Inflamm*. 2017;2017:7279818.  
16  
17 447 18. 2019 ESC/EAS Guidelines for the management of dyslipidaemias: lipid modification to  
18 448 reduce cardiovascular risk | *European Heart Journal* | Oxford Academic [Internet]. [cited  
19 449 2022 Dec 13]. Available from:  
20 450 <https://academic.oup.com/eurheartj/article/41/1/111/5556353>  
21  
22 451 19. Elnabawi YA, Dey AK, Goyal A, Groenendyk JW, Chung JH, Belur AD, et al. Coronary  
23 452 artery plaque characteristics and treatment with biologic therapy in severe psoriasis: results  
24 453 from a prospective observational study. *Cardiovasc Res*. 2019 Mar 15;115(4):721–8.  
25  
26 454 20. López-Melgar B, Mass V, Nogales P, Sánchez-González J, Entekin R, Collet-Billon A, et  
27 455 al. New 3-Dimensional Volumetric Ultrasound Method for Accurate Quantification of  
28 456 Atherosclerotic Plaque Volume. *JACC Cardiovasc Imaging*. 2022 Jun 1;15(6):1124–35.  
29  
30 457 21. Elnabawi YA, Dey AK, Mehta NN. Emerging Applications of Coronary CT Angiography  
31 458 in Coronary Heart Disease: Getting Better with Time. *Eur Heart J*. 2018 Nov  
32 459 1;39(41):3682–4.  
33  
34 460 22. Hjuler KF, Bøttcher M, Vestergaard C, Bøtker HE, Iversen L, Kragballe K. Association  
35 461 Between Changes in Coronary Artery Disease Progression and Treatment With Biologic  
36 462 Agents for Severe Psoriasis. *JAMA Dermatol*. 2016 Oct 1;152(10):1114–21.  
37  
38 463 23. Hu SCS, Lan CCE. Psoriasis and Cardiovascular Comorbidities: Focusing on Severe  
39 464 Vascular Events, Cardiovascular Risk Factors and Implications for Treatment. *Int J Mol*  
40 465 *Sci*. 2017 Oct 21;18(10):2211.  
41  
42 466 24. Estruch R, Ros E, Salas-Salvadó J, Covas MI, Corella D, Arós F, et al. Primary Prevention  
43 467 of Cardiovascular Disease with a Mediterranean Diet Supplemented with Extra-Virgin  
44 468 Olive Oil or Nuts. *N Engl J Med*. 2018 Jun 21;378(25):e34.  
45  
46 469 25. Finlay AY, Khan GK. Dermatology Life Quality Index (DLQI)--a simple practical measure  
47 470 for routine clinical use. *Clin Exp Dermatol*. 1994 May;19(3):210–6.  
48  
49 471 26. Touboul PJ, Hennerici MG, Meairs S, Adams H, Amarenco P, Desvarieux M, et al.  
50 472 Mannheim Intima-Media Thickness Consensus. *Cerebrovasc Dis*. 2004;18(4):346–9.  
51  
52 473 27. Kwan AC, May HT, Cater G, Sibley CT, Rosen BD, Lima JAC, et al. Coronary artery  
53 474 plaque volume and obesity in patients with diabetes: the factor-64 study. *Radiology*. 2014  
54 475 Sep;272(3):690–9.  
55  
56  
57  
58  
59  
60

- 1  
2  
3 476 28. Sorokin AV, Patel N, Abdelrahman KM, Ling C, Reimund M, Graziano G, et al. Complex  
4 477 association of apolipoprotein E-containing HDL with coronary artery disease burden in  
5 478 cardiovascular disease. *JCI Insight*. 7(10):e159577.
- 7 479 29. Martínez-Bartolomé S, Navarro P, Martín-Maroto F, López-Ferrer D, Ramos-Fernández A,  
8 480 Villar M, et al. Properties of average score distributions of SEQUEST: the probability ratio  
9 481 method. *Mol Cell Proteomics MCP*. 2008 Jun;7(6):1135–45.
- 11 482 30. Navarro P, Vázquez J. A refined method to calculate false discovery rates for peptide  
12 483 identification using decoy databases. *J Proteome Res*. 2009 Apr;8(4):1792–6.
- 14 484 31. García-Marqués F, Trevisan-Herraz M, Martínez-Martínez S, Camafeita E, Jorge I, Lopez  
15 485 JA, et al. A Novel Systems-Biology Algorithm for the Analysis of Coordinated Protein  
16 486 Responses Using Quantitative Proteomics. *Mol Cell Proteomics MCP*. 2016  
17 487 May;15(5):1740–60.
- 19 488 32. Isern J, Martín-Antonio B, Ghazanfari R, Martín AM, López JA, del Toro R, et al. Self-  
20 489 renewing human bone marrow mesospheres promote hematopoietic stem cell expansion.  
21 490 *Cell Rep*. 2013 May 30;3(5):1714–24.
- 23 491 33. von Elm E, Altman DG, Egger M, Pocock SJ, Gøtzsche PC, Vandenbroucke JP, et al. The  
24 492 Strengthening the Reporting of Observational Studies in Epidemiology (STROBE)  
25 493 Statement: guidelines for reporting observational studies. *Int J Surg Lond Engl*. 2014  
26 494 Dec;12(12):1495–9.
- 28 495 34. Gonzalez-Cantero A, Reddy AS, Dey AK, Gonzalez-Cantero J, Munger E, Rodante J, et al.  
29 496 Underperformance of clinical risk scores in identifying imaging-based high cardiovascular  
30 497 risk in psoriasis: results from two observational cohorts. *Eur J Prev Cardiol*. 2022 Mar  
31 498 30;29(4):591–8.
- 33 499 35. González-Cantero A, Ortega-Quijano D, Álvarez-Díaz N, Ballester MA, Jimenez-Gomez  
34 500 N, Jaen P, et al. Impact of Biological Agents on Imaging and Biomarkers of Cardiovascular  
35 501 Disease in Patients with Psoriasis: A Systematic Review and Meta-Analysis of Randomized  
36 502 Placebo-Controlled Trials. *J Invest Dermatol*. 2021 Oct;141(10):2402–11.
- 38 503 36. Kaiser H, Wang X, Kvist-Hansen A, Krakauer M, Gørtz PM, McCauley BD, et al.  
39 504 Biomarkers of subclinical atherosclerosis in patients with psoriasis. *Sci Rep*. 2021 Nov  
40 505 2;11(1):21438.
- 42 506 37. Qi F, Tan Y, Yao A, Yang X, He Y. Psoriasis to Psoriatic Arthritis: The Application of  
43 507 Proteomics Technologies. *Front Med*. 2021;8:681172.

#### 508 **Author contributions:**

509 Carlota Abbad- Jaime de Aragón.: Investigation, Conceptualization, Methodology, Original draft  
510 preparation, Visualization. Emilio Berna-Rico.: Conceptualization, Methodology, Visualization,  
511 Writing- Reviewing and Editing. María Asunción Ballester-Martinez.: Writing- Reviewing and  
512 Editing. Pedro Jaén.: Writing- Reviewing and Editing. Jorge Solís.: Writing- Reviewing and  
513 Editing. María G. Barderas.: Software, Validation. Leticia Fernández- Frieria.: Writing-



1  
2  
3 514 Reviewing and Editing. Nehal N Mehta.: Writing- Reviewing and Editing. Joel M Gelfand.:  
4  
5 515 Writing- Reviewing and Editing. Álvaro González-Cantero.: Conceptualization, Methodology,  
6  
7 516 Writing- Reviewing and Editing, Funding acquisition, Supervision.  
8  
9

10 517 **Funding statement:**

11  
12 518 The EDSAP study is funded by competitive independent grants from the *Instituto de Salud Carlos*  
13  
14 519 *III* and the National Psoriasis Foundation and also by non-competitive investigator-initiated  
15  
16 520 studies (Leo-Pharma, Almirall and Amgen).  
17  
18  
19

20 521 **Competing interests statement:**

21  
22 522 NNM is a full- time US government employee and has served as a consultant for several  
23  
24 523 pharmaceutical companies, receiving grants and/or research funding; and as a principal  
25  
26 524 investigator for the NIH receiving grants and/or research funding. JMG served as a consultant for  
27  
28 525 several pharmaceutical companies, receiving honoraria and research grants (to the Trustees of the  
29  
30 526 University of Pennsylvania). JMG is a co-patent holder of resiquimod for treatment of cutaneous  
31  
32 527 T cell lymphoma. JMG receives honoraria from multiple organisms, for being a Deputy Editor  
33  
34 528 for the Journal of Investigative Dermatology, Chief Medical Editor for Healio Psoriatic Disease.  
35  
36 529 He is also a member of the Board of Directors for the International Psoriasis Council, receiving  
37  
38 530 no honoraria. ACG has served as a consultant for several pharmaceutical companies receiving  
39  
40 531 grants/other payments. MABM has served as a consultant for several pharmaceutical companies  
41  
42 532 receiving honoraria. LFF, JS, EBR, MGB, PJ, CAJ have no interests to disclose.  
43  
44  
45

46 533

47 534

48 535

49 536

50 537

51 538

52 539

53 540

1  
2  
3  
4  
5  
6  
7  
8  
9  
10  
11  
12  
13  
14  
15  
16  
17  
18  
19  
20  
21  
22  
23  
24  
25  
26  
27  
28  
29  
30  
31  
32  
33  
34  
35  
36  
37  
38  
39  
40  
41  
42  
43  
44  
45  
46  
47  
48  
49  
50  
51  
52  
53  
54  
55  
56  
57  
58  
59  
60

541 **Figure legends:**

542 **Figure 1:** EDSAP study flow. CCTA, coronary computed tomography angiography. 2D, 2-  
543 dimensional. 3D, 3-dimensional.

544 **Figure 2.** Participant timeline. This flow diagram illustrates the participant timeline including  
545 enrollment, baseline and 1-year follow up visits, the analysis of data and publication of results.

546 **Figure 3.** 2D vascular ultrasound of atherosclerotic plaque (white arrow) in the right femoral  
547 artery and (A) and 3D vascular ultrasound of another atherosclerotic plaque (black arrow).

548 **Figure 4.** Left anterior descending coronary artery with (green arrow) and without atheroma  
549 plaque by CCTA.

550

551

552

For peer review only

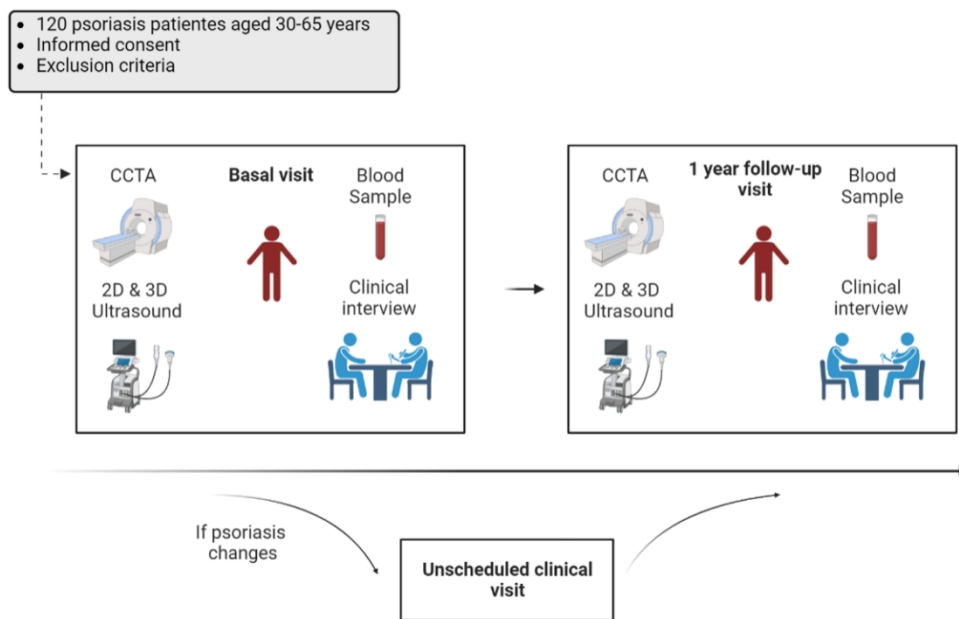

Figure 1. EDSAP study flow. CCTA, coronary computed tomography angiography. 2D, 2-dimensional. 3D, 3-dimensional.

100x64mm (300 x 300 DPI)

1  
2  
3  
4  
5  
6  
7  
8  
9  
10  
11  
12  
13  
14  
15  
16  
17  
18  
19  
20  
21  
22  
23  
24  
25  
26  
27  
28  
29  
30  
31  
32  
33  
34  
35  
36  
37  
38  
39  
40  
41  
42  
43  
44  
45  
46  
47  
48  
49  
50  
51  
52  
53  
54  
55  
56  
57  
58  
59  
60

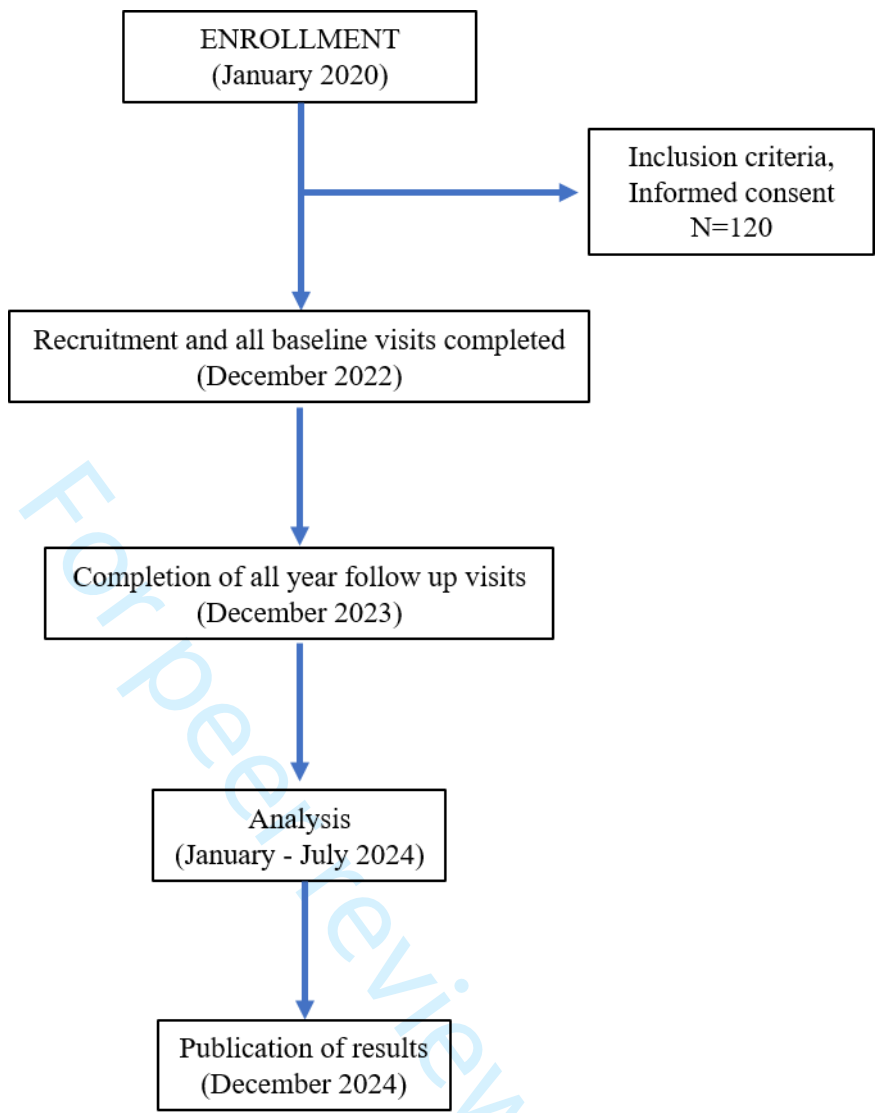

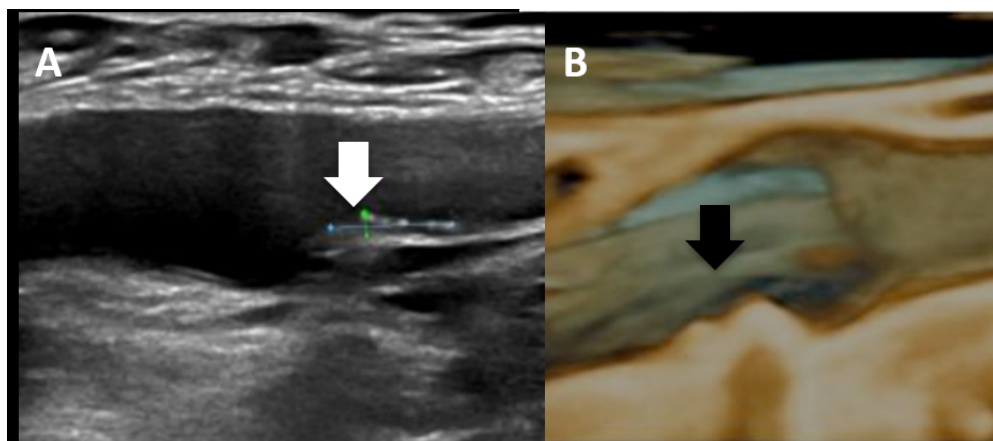

Figure 3. 2D vascular ultrasound of atherosclerotic plaque (white arrow) in the right femoral artery and (A) and 3D vascular ultrasound of another atherosclerotic plaque (black arrow).

79x34mm (300 x 300 DPI)

1  
2  
3  
4  
5  
6  
7  
8  
9  
10  
11  
12  
13  
14  
15  
16  
17  
18  
19  
20  
21  
22  
23  
24  
25  
26  
27  
28  
29  
30  
31  
32  
33  
34  
35  
36  
37  
38  
39  
40  
41  
42  
43  
44  
45  
46  
47  
48  
49  
50  
51  
52  
53  
54  
55  
56  
57  
58  
59  
60

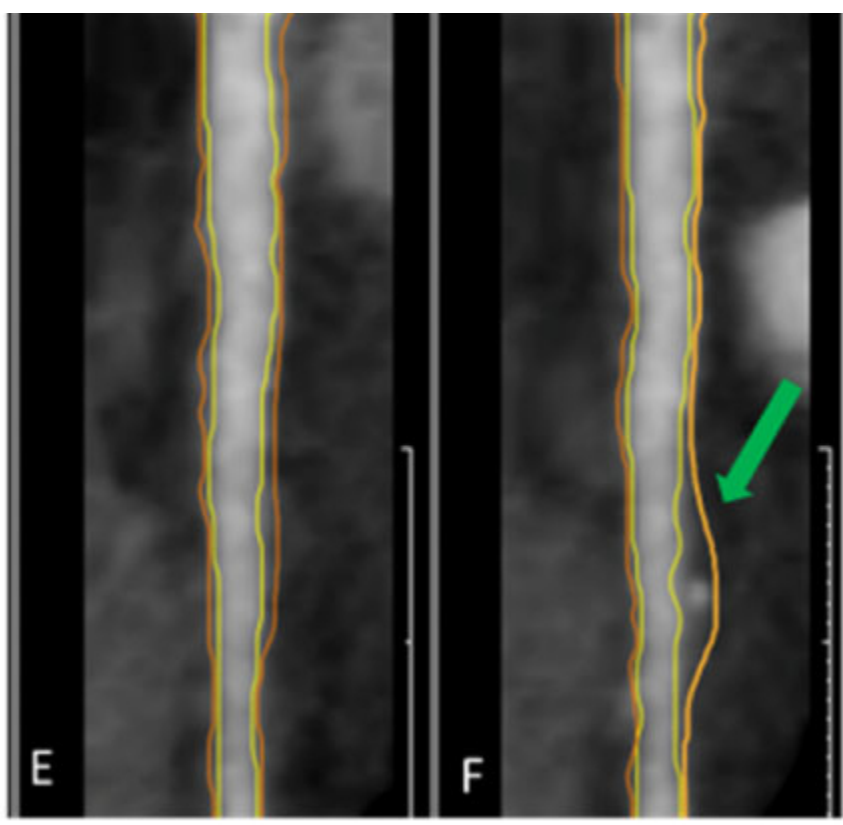

Figure 4. Left anterior descending coronary artery with (green arrow) and without atheroma plaque by CCTA  
190x180mm (57 x 57 DPI)

# BMJ Open

## The Early Detection and Progression of Subclinical Atherosclerosis in Psoriasis (EDSAP): Protocol for an observational, single-center, prospective cohort study.

|                                 |                                                                                                                                                                                                                                                                                                                                                                                                                                                                                                                                                                                                                                                                                                                                                                                                                                                                                                                                                                                                                                                  |
|---------------------------------|--------------------------------------------------------------------------------------------------------------------------------------------------------------------------------------------------------------------------------------------------------------------------------------------------------------------------------------------------------------------------------------------------------------------------------------------------------------------------------------------------------------------------------------------------------------------------------------------------------------------------------------------------------------------------------------------------------------------------------------------------------------------------------------------------------------------------------------------------------------------------------------------------------------------------------------------------------------------------------------------------------------------------------------------------|
| Journal:                        | <i>BMJ Open</i>                                                                                                                                                                                                                                                                                                                                                                                                                                                                                                                                                                                                                                                                                                                                                                                                                                                                                                                                                                                                                                  |
| Manuscript ID                   | bmjopen-2023-072455.R2                                                                                                                                                                                                                                                                                                                                                                                                                                                                                                                                                                                                                                                                                                                                                                                                                                                                                                                                                                                                                           |
| Article Type:                   | Protocol                                                                                                                                                                                                                                                                                                                                                                                                                                                                                                                                                                                                                                                                                                                                                                                                                                                                                                                                                                                                                                         |
| Date Submitted by the Author:   | 29-Jul-2023                                                                                                                                                                                                                                                                                                                                                                                                                                                                                                                                                                                                                                                                                                                                                                                                                                                                                                                                                                                                                                      |
| Complete List of Authors:       | <p>Abbad- Jaime de Aragón, Carlota; Hospital Universitario Ramon y Cajal, Dermatology<br/>         Berna-Rico, Emilio; Hospital Universitario Ramon y Cajal, Dermatology<br/>         Ballester-Martinez, María Asunción; Hospital Universitario Ramon y Cajal, Dermatology<br/>         Jaén, Pedro; Hospital Universitario Ramon y Cajal, Dermatology<br/>         Solís, Jorge; Hospital Universitario 12 de Octubre, Cardiology; Atria Clinic<br/>         G. Barderas, María; Hospital Nacional de Paraplégicos, IDISCAM. Toledo, Spain, Department of Vascular Physiopathology<br/>         Fernández- Frieria, Leticia ; Atria Clinic; HM Hospitales, Centro Integral de Enfermedades Cardiovasculares HM CIEC<br/>         N Mehta, Nehal; Department of Cardiology,, George Washington Medical Center, Washington D.C, USA<br/>         Gelfand, Joel ; University of Pennsylvania<br/>         González-Cantero, Álvaro; Hospital Universitario Ramon y Cajal, Dermatology; Universidad Francisco de Vitoria, Facultad de Medicina</p> |
| <b>Primary Subject Heading</b>: | Dermatology                                                                                                                                                                                                                                                                                                                                                                                                                                                                                                                                                                                                                                                                                                                                                                                                                                                                                                                                                                                                                                      |
| Secondary Subject Heading:      | Cardiovascular medicine                                                                                                                                                                                                                                                                                                                                                                                                                                                                                                                                                                                                                                                                                                                                                                                                                                                                                                                                                                                                                          |
| Keywords:                       | Psoriasis < DERMATOLOGY, Coronary heart disease < CARDIOLOGY, Computed tomography < RADIOTHERAPY, Ultrasound < RADIOLOGY & IMAGING                                                                                                                                                                                                                                                                                                                                                                                                                                                                                                                                                                                                                                                                                                                                                                                                                                                                                                               |
|                                 |                                                                                                                                                                                                                                                                                                                                                                                                                                                                                                                                                                                                                                                                                                                                                                                                                                                                                                                                                                                                                                                  |

SCHOLARONE™  
Manuscripts

1  
2  
3 **Title:** The Early Detection and Progression of Subclinical Atherosclerosis in Psoriasis (EDSAP):  
4  
5 Protocol for an observational, single-center, prospective cohort study.  
6  
7

8 **Authors:** Carlota Abbad-Jaime de Aragón, MSc<sup>a\*</sup>, Emilio Berna- Rico, MD<sup>a\*</sup>, María Asunción  
9  
10 Ballester-Martinez, MD<sup>a</sup>, Pedro Jaén, MD, PhD<sup>a</sup>, Jorge Solís, MD, PhD<sup>b,c</sup>, María G. Barderas,  
11  
12 PhD<sup>d</sup>, Leticia Fernández- Frieria, MD, PhD<sup>c,e</sup>, Nehal N Mehta, MD, MDSCE<sup>f</sup>, Joel M Gelfand,  
13  
14 MD, MDSCE<sup>g</sup>, Álvaro González-Cantero, MD, PhD<sup>a,h</sup>  
15  
16

17 \*These authors contributed equally.  
18

- 19  
20 a. Department of dermatology, Hospital Universitario Ramón y Cajal, IRYCIS. Madrid,  
21  
22 Spain.  
23  
24 b. Department of Cardiology, Hospital Universitario 12 de Octubre. Madrid, Spain.  
25  
26  
27 c. AtriaClinic, Madrid.  
28  
29  
30 d. Department of Vascular Physiopathology, Hospital Nacional de Paraplégicos, IDISCAM.  
31  
32 Toledo, Spain.  
33  
34  
35 e. Centro Integral de Enfermedades Cardiovasculares HM CIEC, HM Hospitales, Madrid,  
36  
37 Spain.  
38  
39  
40 f. Department of Cardiology, George Washington Medical Center, Washington D.C, USA.  
41  
42  
43 g. Department of Biostatistics, Epidemiology & Informatics, Perelman School of Medicine,  
44  
45 University of Pennsylvania, Philadelphia, Pennsylvania, USA; Department of  
46  
47 Dermatology, Perelman School of Medicine, University of Pennsylvania, Philadelphia,  
48  
49 Pennsylvania, USA.  
50  
51  
52 h. Facultad de Medicina, Universidad Francisco de Vitoria, Ctra. Pozuelo-Majadahonda  
53  
54 KM 1.800, 28223 Pozuelo de Alarcón, Spain.  
55  
56  
57  
58  
59  
60



1  
2  
3 25 **Corresponding author:**  
4

5  
6 26 Álvaro González-Cantero.  
7

8  
9 27 Dermatology Department, Ramon y Cajal University Hospital. IRYCIS. Colmenar Viejo km

10  
11 28 9.100, 28034 Madrid, Spain.  
12

13  
14 29 e-mail: alvarogonzalezcantero@gmail.com  
15

16  
17 30 Phone: +34 620 408 898; FAX +3491373508  
18

19 31 **Keywords:**

20  
21  
22 32 Psoriasis; inflammation; cardiovascular disease; vascular imaging; coronary CTA; proteomics.  
23

24  
25 33 **Abstract word count:** 284 words  
26

27  
28 34 **Manuscript word count:** 3.717 words  
29

30  
31 35 **Number of figures:** 4  
32

33 36  
34

35  
36 37  
37

38  
39 38  
40

41  
42 39  
43

44  
45 40  
46

47  
48 41  
49

50  
51 42  
52

53  
54 43  
55

56  
57 44  
58

59  
60 45

1  
2  
3 46 **ABSTRACT**  
4  
5

6 47 **Introduction:** Life expectancy of patients with psoriasis is reduced by 4-5 years due to  
7  
8 48 cardiovascular disease with an increased risk of myocardial infarction at an earlier age compared  
9  
10 49 to general population. This increased risk is independent of traditional cardiovascular risk factors  
11  
12 50 and higher in moderate-to-severe forms of psoriasis. Inflammation may play a key role in the  
13  
14 51 development of atherosclerosis in these patients.  
15  
16

17 52 **Methods and analysis:** A prospective cohort study, Early Detection and Progression of  
18  
19 53 Subclinical Atherosclerosis in Psoriasis (EDSAP), was initiated in January 2020 to investigate  
20  
21 54 the presence and progression of subclinical atherosclerosis in patients with psoriasis. 120 patients  
22  
23 55 aged 30-65 years and eligible for biological treatment have been recruited at Hospital Ramón y  
24  
25 56 Cajal in Madrid, Spain. Patients undergo a baseline visit, and one-year follow up visit after  
26  
27 57 starting biologic therapy. Each visit includes: assessment of cardiovascular risk factors, screening  
28  
29 58 for subclinical atherosclerosis by 2D/3D ultrasound of carotid and femoral arteries, cardiac  
30  
31 59 computed tomography of coronary arteries and blood sampling. All baseline visits were  
32  
33 60 completed by December 2022, and the remaining follow-up visits will be concluded by the end  
34  
35 61 of 2023. The EDSAP study aims to identify new molecular and imaging markers associated with  
36  
37 62 the presence of atherosclerosis and its progression in a chronic inflammatory state such as  
38  
39 63 psoriasis. This has the potential to: (1) help improve primary cardiovascular prevention strategies  
40  
41 64 in these patients; (2) understand the effect of biologic drugs on the cardiovascular system; (3)  
42  
43 65 serve as a model for understanding atherosclerosis in other chronic inflammatory diseases.  
44  
45  
46

47 66 **Ethics and dissemination:** The study protocol has been approved by the Institutional Review  
48  
49 67 Board of the Hospital Ramón y Cajal in Madrid (HIP/CI-BIOB-058-01). We will present our  
50  
51 68 findings at national and international congresses, and peer-reviewed journals.  
52  
53  
54  
55  
56  
57  
58  
59  
60

1  
2  
3 72 **Strengths and limitations**  
4  
5

- 6 73 • Strict application of protocols, the collection of biobank samples and the prospective data  
7  
8 74 collection which allows to evaluate the impact of anti-inflammatory therapies on  
9  
10 75 atheroma plaque characterization and modulation.  
11  
12 76 • The application of state-of-the-art scientific techniques to measure the anatomical and  
13  
14 77 biological characteristics of subclinical atherosclerosis.  
15  
16 78 • Being an observational study, it is more vulnerable to potential confounding factors  
17  
18 79 compared to randomized controlled trials.  
19  
20 80 • The open-label, non-randomized use of psoriasis treatments in a small sample size and  
21  
22 81 with a short follow-up duration.  
23  
24  
25  
26  
27  
28  
29  
30  
31 84  
32  
33  
34  
35  
36  
37  
38  
39  
40  
41  
42  
43  
44  
45  
46  
47  
48  
49  
50  
51  
52  
53  
54  
55  
56  
57  
58  
59  
60

## 85 INTRODUCTION

86 Psoriasis is a complex chronic inflammatory and immune-mediated disease of the skin and joints  
87 associated with multiple comorbidities (1,2). The life expectancy of patients with psoriasis is  
88 reduced by 4-5 years due to cardiovascular (CV) disease, and there is an increased risk of  
89 myocardial infarction at an earlier age compared to individuals without the disease (3,4). This  
90 elevated CV risk could be due to systemic inflammation characteristic, especially in the moderate-  
91 to-severe forms of the disease (5,6). Therefore, classical screening methods such as the  
92 Framingham risk score, which is based on classical cardiovascular risk factors (CVRFs), do not  
93 reliably assess the risk of coronary heart disease in patients with psoriasis (4,7,8).

94 Detection of atherosclerosis in its subclinical stage may help to identify strategies to halt the  
95 development of the disease. Many imaging studies in patients with psoriasis assessed subclinical  
96 atherosclerosis in individual vascular territories (4,9–13), but given the systemic nature of  
97 atherosclerosis, a multi-territorial analysis has the potential to provide a more comprehensive  
98 overview of the distribution and burden of atherosclerosis in these patients (14). The natural  
99 history of atherosclerosis involves a prolonged subclinical phase, where the disease is usually  
100 detected only at an advanced stage or after a CV event. Early detection of subclinical  
101 atherosclerosis and adoption of primary prevention measures, including adequate control of  
102 systemic inflammation, may minimise the risk of CV disease in patients with psoriasis. It has  
103 therefore been proposed that these patients should undergo comprehensive screening for  
104 subclinical atherosclerosis (4), a proposal that has arisen from the need to find a non-invasive,  
105 simple and widely available biomarker for its early detection (15).

106 The most widely used and validated technique for screening subclinical atherosclerosis is vascular  
107 ultrasound (VUS), a reproducible, non-invasive technique with no side effects. In the last years,  
108 there has been a particular interest in the study of subclinical atherosclerosis in the femoral  
109 arteries. Studies in healthy adults have shown that femoral plaques are more prevalent than carotid  
110 plaques and are more associated with traditional CVRFs and coronary calcium (15,16), as well as  
111 being an independent predictor of future CV events (14,17). Interestingly, in the PESA study

1  
2  
3 112 (middle-aged participants from the general population), the presence of iliofemoral disease  
4  
5 113 increases the risk of concurrent coronary calcium and is predictive of disease elsewhere (14). In  
6  
7 114 fact, screening femoral arteries with vascular ultrasound has been introduced in current clinical  
8  
9 115 practice guidelines as a risk modifier in individuals at low or moderate risk individuals (18). In  
10  
11 116 this regard, our research group evaluated the usefulness of femoral artery ultrasound for the  
12  
13 117 detection of subclinical atherosclerosis in psoriasis. We observed that screening of femoral  
14  
15 118 plaques improves the detection of subclinical atherosclerosis in these patients, whereas carotid  
16  
17 119 artery scanning was not sufficiently accurate (15,19). Semiautomated 3-dimensional vascular  
18  
19 120 ultrasound (3DVUS) has been proposed as a better method for quantifying peripheral  
20  
21 121 atherosclerotic burden. 3DVUS is a feasible, reproducible and novel imaging technique to  
22  
23 122 quantify early carotid and femoral atherosclerotic burden in large populations. Furthermore, 3D-  
24  
25 123 VUS offers incremental value over the presence of plaque alone in its association with  
26  
27 124 cardiovascular risk (16,20). In the last decade, the advent of coronary computed tomography  
28  
29 125 angiography (CCTA) has emerged as a promising non-invasive tool to assess coronary artery  
30  
31 126 structure over time. It has been proposed that the ability of CCTA to identify and quantify the  
32  
33 127 morphology of high-risk plaques, together with therapy monitoring, will eventually become the  
34  
35 128 cornerstone of treatment personalisation (21).  
36  
37  
38  
39 129 Several studies have shown the potential benefits of biologic therapies on CV disease risk in  
40  
41 130 patients with psoriasis. Biologic therapy in severe psoriasis has been associated with a favourable  
42  
43 131 modulation of coronary plaque indices by CCTA (19,22). These results support the need to  
44  
45 132 expand our knowledge on the potential effects of biologic therapies in atherosclerosis.  
46  
47  
48  
49 133 In addition to imaging techniques, there is a need to discover and validate new molecular markers  
50  
51 134 that have practical value for clinical intervention as well as for identifying and elucidating CV  
52  
53 135 disease processes at the individual level. Therefore, proteomic studies are needed to gain further  
54  
55 136 insights in psoriasis-associated accelerated atherosclerosis in order to obtain a comprehensive  
56  
57 137 overview of this high-risk population.  
58  
59  
60

1  
2  
3 138 This article describes the rationale, aims and methods of the EDSAP study protocol, a longitudinal  
4  
5 139 cohort study to decipher the molecular, imaging and clinical characteristics of this accelerated  
6  
7 140 atherosclerosis phenotype associated with psoriasis and to explore the effect of anti-inflammatory  
8  
9 141 therapies on it.  
10

## 11 12 142 **STUDY OBJECTIVES**

13  
14  
15 143 The objectives of the EDSAP study are: (1) to assess the prevalence, vascular distribution and  
16  
17 144 burden of subclinical atherosclerosis in patients with psoriasis and its relationship with  
18  
19 145 inflammatory biomarkers and CV risk algorithms using 2DVUS of carotid and femoral arteries,  
20  
21 146 3DVUS of carotid and femoral arteries and CCTA; (2) to characterize the composition of  
22  
23 147 atherosclerotic plaques by CCTA and 3D-VUS of the carotid and femoral arteries; (3) to evaluate  
24  
25 148 the effect of different treatments used in psoriasis on the progression and characterisation of  
26  
27 149 subclinical atherosclerosis in different arterial territories assessed by non-invasive imaging  
28  
29 150 techniques; and (4) to characterise the atherosclerosis process in patients with psoriasis using  
30  
31 151 laboratory analysis and "-omics" technologies, as well as to evaluate changes at the molecular  
32  
33 152 level after treatment of the skin disease.  
34  
35

## 36 37 153 **STUDY DESIGN AND POPULATION**

38  
39 154 The EDSAP study is an observational, longitudinal, prospective cohort study that includes  
40  
41 155 psoriasis patients who will undergo a one-year medical follow-up (Figure 1). Recruitment is  
42  
43 156 voluntary among patients attending dermatology consultations at the Hospital Ramón y Cajal,  
44  
45 157 Madrid (Spain).  
46  
47

48 158 The study includes participants aged between 30 to 65 years, diagnosed with psoriasis clinically  
49  
50 159 by an expert physician and deemed suitable for biologic therapy by the investigator. Exclusion  
51  
52 160 criteria are as follows: history of CV disease (myocardial infarction, angina pectoris, peripheral  
53  
54 161 vascular disease, aortic aneurysm, angioplasty, cardiac surgery, atrial fibrillation or any other  
55  
56 162 cardiological condition), current oncological treatment, history of transplantation with active  
57  
58 163 immunosuppressive or immunomodulatory treatment, morbid obesity (body mass index  $\geq 40$   
59  
60

1  
2  
3 164 kg/m<sup>2</sup>), diabetes mellitus, chronic liver disease, chronic kidney disease (glomerular filtration rate  
4  
5 165 <60 mL/min/1.73 m<sup>2</sup>), other chronic inflammatory disease, presence of any pathology that  
6  
7 166 decreases life expectancy to less than 3 years, or any disease or condition that could affect  
8  
9 167 adherence to study procedures. In addition, participants will be excluded if they have had a chest  
10  
11 168 computed tomography (CT) scan in the previous year, are pregnant or breastfeeding.

### 14 169 **DATA COLLECTION**

17 170 Two study visits are scheduled for each participant: at baseline and 1-year follow up. Both of  
18  
19 171 them include a clinical interview, physical examination (height, weight, waist circumference,  
20  
21 172 blood pressure and psoriasis severity through psoriasis area severity index -PASI-), fasting blood  
22  
23 173 draw and assessment of atherosclerotic disease by non-invasive vascular imaging tests  
24  
25 174 (2D/3DVUS and CCTA). Participants who experience primary or secondary failure of the initial  
26  
27 175 treatment may undergo an unscheduled clinic visit as part of standard clinical practice, given the  
28  
29 176 observational nature of this study. The attending physician will make the decision to change  
30  
31 177 treatment based on the patient's previous medical history and clinical presentation. This visit will  
32  
33 178 include a clinical interview, a physical examination, and a fasting blood draw. Imaging studies  
34  
35 179 will not be repeated due to the radiation exposure associated with CCTA. Training sessions and  
36  
37 180 certification of all personnel involved in data collection are repeated throughout the study.  
38  
39 181 Inclusion started in January 2020 with baseline visits completed for all 120 patients by the end of  
40  
41 182 2022. The remaining 1-year follow up visits are expected to be completed by the end of 2023  
42  
43 183 (Figure 2).

### 47 184 **CLINICAL INTERVIEW: PSORIASIS PAST MEDICAL HISTORY, CVRFS, DIET AND** 48 49 185 **LIFESTYLE HABITS**

51  
52 186 Regarding CVRFS, patients are assessed for diabetes mellitus, hypertension, hyperlipidemia  
53  
54 187 obesity, smoking, metabolic syndrome and sedentary lifestyle (23). To assess the impact of the  
55  
56 188 Mediterranean diet on the CV risk in patients with psoriasis, a questionnaire from the PREDIMED  
57  
58 189 (Prevention with Mediterranean Diet) study is used. This is a validated tool that assesses the  
59  
60

1  
2  
3 190 degree of adherence to the Mediterranean dietary pattern with 14 simple questions (24). In order  
4  
5 191 to measure the impact of psoriasis on patients' daily activities, the Dermatology Life Quality Index  
6  
7 192 (DLQI) questionnaire is employed (25). It is a unidimensional scale consisting of a short, simple  
8  
9 193 and easy-to-complete 10-question self-administered questionnaire. The questions are related to  
10  
11 194 the perception of the impact of the skin disease on quality of life in the last week. All  
12  
13 195 questionnaires are provided at all visits. Patients will also be asked about psoriasis duration,  
14  
15 196 previous disease treatments and psoriasis comorbidities including psoriasis arthritis and intestinal  
16  
17 197 bowel disease.

### 18 19 20 21 198 **VASCULAR IMAGING STUDIES**

22  
23 199 Carotid and femoral arteries are explored using 2DVUS and 3DVUS (Figure 3). Staff performing  
24  
25 200 and interpreting the images are blinded to the variables of the study and any other imaging  
26  
27 201 procedures. A Philips iU22® ultrasound system (Philips Healthcare Andover, MA), using a 2D  
28  
29 202 L9-3 MHz high-resolution linear transducer is employed for 2VUS image acquisition. The study  
30  
31 203 protocol includes cross-sectional and longitudinal views of both carotid and femoral arteries to  
32  
33 204 detect plaques and standardized longitudinal views for intima-media thickness measurements.  
34  
35 205 2DVUS images will be analyzed using QLAB software (Intellispace Portal, Philips Healthcare).  
36  
37 206 2DVUS analysis includes assessment of carotid and femoral IMT (values >0.9 mm will be  
38  
39 207 considered abnormal), the presence and extension of atherosclerotic plaques in the carotid and  
40  
41 208 femoral territories (plaques are defined as a focal protrusion into the arterial lumen of thickness  
42  
43 209 >0.5 mm or >50% of the surrounding IMT or a diffuse thickness >1.5 mm measured between the  
44  
45 210 media-adventitia and intima-lumen interfaces), maximal plaque thickness (maximal distance  
46  
47 211 between the plaque-lumen and the plaque-adventitia interfaces), and plaque stenosis severity  
48  
49 212 (significant stenosis will be considered when luminal narrowing is >50%) (26).

50  
51  
52  
53 213 A Philips iU22® ultrasound system equipped with a VL13-5 2D/3D volume linear array  
54  
55 214 transducer (Philips Healthcare) is used for the 3DVUS protocol. The acquisition protocol for the  
56  
57 215 carotid arteries consists of a 30° automatic sweep (explored vessel segment =6 cm long) centered  
58  
59 216 at the carotid bulb to include the distal common carotid artery, the bulb, the bifurcation, and the



1  
2  
3 217 proximal internal and external carotid artery segments. For the femoral arteries, acquisition is  
4  
5 218 centered at the bifurcation and includes the mid-distal common femoral artery, the bifurcation,  
6  
7 219 and the proximal superficial and deep femoral artery segments. Images will be analyzed using the  
8  
9 220 Vascular Plaque Quantification (VPQ) feature of QLAB software (Intellispace Portal, Philips).  
10  
11 221 The 3D variables quantified include: plaque volume, which will be determined by measuring the  
12  
13 222 volumes of each atherosclerotic plaque visualized in the standardized 3D acquisition of each  
14  
15 223 carotid and femoral artery individually as well as their sum, number of plaques by vascular site  
16  
17 224 and participant and 3D vessel wall volume or burden, as the plaque volume between the outer and  
18  
19 225 inner wall boundaries (12).  
20  
21  
22

### 23 **CORONARY IMAGING STUDIES**

24  
25 227 CCTA is performed with a 320-detector CT scanner (Aquilion ONE VISION, Toshiba, Japan) at  
26  
27 228 the Hospital Universitario HM Sanchinarro in Madrid, following the guidelines of the NIH  
28  
29 229 Radiation Exposure Committee. Scans are performed with prospective or retrospective EKG  
30  
31 230 gating according to heart rate, tube potential of 100 or 120 kV, tube current of 100-850mA  
32  
33 231 adjusted to the patient's body size, with a gantry rotation time of 275 ms. Images are being  
34  
35 232 acquired with a slice thickness of 0.5 mm and a slice increment of 0.25 mm. Patient  
36  
37 233 characteristics, such as date of visit and treatment, will not be considered when reading the scans.  
38  
39 234 Coronary plaque quantification and characteristics will be analyzed in each of the main coronary  
40  
41 235 arteries (with a diameter >2 mm) using specific software (QAngio CT, Medis; The Netherlands)  
42  
43 236 (4,27). Automated longitudinal contouring of the inner lumen and outer wall will be performed,  
44  
45 237 manually adjusting the results when there are clear deviations. Results of the automated  
46  
47 238 contouring will also be reviewed on transverse reconstructed cross-sections of the artery on a  
48  
49 239 section-by-section basis at 0.25-mm increments. Lumen attenuation will be adaptively corrected  
50  
51 240 for each scan using gradient filters and intensity values within the artery.  
52  
53  
54  
55 241 Plaque volume (in cubic millimeters) will be divided by the corresponding segment length (in  
56  
57 242 millimeters), to obtain a plaque index to take into account variable coronary artery lengths. Total  
58  
59 243 plaque burden is defined as the sum of calcified plaque burden and non-calcified plaque burden  
60

1  
2  
3 244 (NCB), assessed in square millimeters. Non-calcified plaque volume and subcomponents will be  
4  
5 245 obtained after adaptively correcting for lumen attenuation and represented as a function of the  
6  
7 246 software-derived Hounsfield units as previously described (28). Also, high-risk plaque features,  
8  
9 247 defined as positive remodeling (remodeling index  $> 1.10$ ), low-attenuation ( $<30$  HU), or spotty  
10  
11 248 calcification will be evaluated.

12  
13  
14 249 All CCTA images will be analyzed in the Advanced Cardiac Imaging Unit at HM Sanchinarro,  
15  
16 250 Madrid, and in The Laboratory of Inflammation and Cardiometabolic Diseases, National Heart,  
17  
18 251 Lung and Blood Institute (Maryland, United States) for specific analysis. Figure 4 shows an  
19  
20 252 example of coronary arteries with (green arrow) and without subclinical atherosclerosis by CCTA.

### 23 253 **PHYSICAL EXAMINATION, LABORATORY ANALYSIS AND BIOBANKING**

24  
25  
26 254 Patients undergo basic clinical studies in which they are weighed, measured, have their blood  
27  
28 255 pressure taken, their waist circumference measured and their PASI evaluated. Moreover, fasting  
29  
30 256 blood samples are collected at baseline, 1-year follow-up and flare-up visits as part of the clinical  
31  
32 257 process. We will collect data of the results of the analysis of serum glucose, uric acid, alkaline  
33  
34 258 phosphatase, bilirubin, apolipoprotein A1, apolipoprotein B, triglycerides, GlycA, total  
35  
36 259 cholesterol, high-density lipoprotein cholesterol, low-density lipoprotein cholesterol, C-reactive  
37  
38 260 protein, C-reactive protein ultra, lipoprotein (a), haptoglobin, insulin, hemoglobin, lymphocytes,  
39  
40 261 neutrophils, monocytes and leukocytes. In addition, blood samples are collected in each scheduled  
41  
42 262 visit to be processed and stored at  $-80^{\circ}\text{C}$  for high-throughput “omics” analysis and biobanking.  
43  
44 263 Each aliquot is assigned a unique identifier by using a laboratory information management system  
45  
46 264 (Bio-e-Bank), managed by the Ramón y Cajal Institute for Health Research (IRYCIS), to ensure  
47  
48 265 adequate tracking of all procedures.

49  
50  
51  
52 266 The proteomic analysis will be performed by qualified personnel from the vascular  
53  
54 267 physiopathology department of the Hospital Nacional de Paraplégicos in Toledo. Building on the  
55  
56 268 previous experience of our group, atherosclerosis in patients with psoriasis will be studied at the  
57  
58 269 molecular level, trying to generate proteomic profiles that will allow us to obtain new data that  
59  
60

1  
2  
3 270 shed light on this high-risk phenotype, incorporating the most recent advances in post-genomic  
4  
5 271 sciences to identify panels of novel biomarkers that can serve as potential tools in the diagnosis  
6  
7 272 and prognosis of the early phase of atherosclerosis, allowing to improve the primary, or even  
8  
9 273 primordial, preventive strategies for the management of cardiovascular risk in these patients. To  
10  
11 274 this end, the overall proteomic discovery strategy will consist of a discovery phase, a verification  
12  
13 275 phase and a validation phase: (1) The discovery phase will be performed using TMT 10-plex  
14  
15 276 reagents, followed by LC-MS/MS using a reverse-phase C-18 nanocolumn. Identification of  
16  
17 277 selected peptides will be performed using the likelihood ratio method (29) and the false discovery  
18  
19 278 rate (FDR) calculated using inverted databases and the refined method (30). Only peptides  
20  
21 279 identified with  $FDR \leq 1\%$  will be used to quantify the relative abundance of each protein from  
22  
23 280 reporter ion intensities. For statistical analysis of quantitative data, the WSPP statistical model  
24  
25 281 will be used (31). Finally, a functional analysis of the whole set of quantified proteins will be  
26  
27 282 performed by analyzing the coordinated protein responses in quantitative proteomics experiments  
28  
29 283 - the systems biology triangle (SBT) (32), which correlates the performance of groups of proteins  
30  
31 284 within a biological process with their quantitative behavior. (2) The verification phase will  
32  
33 285 involve a targeted proteomics strategy to study the proteins and the mechanisms previously  
34  
35 286 described by our group, which possibly could be involved in psoriasis, focusing on their  
36  
37 287 relationship with atherosclerosis and CV risk stratification. (3) The Validation phase will consist  
38  
39 288 of targeted proteomics and immunoassays. The results obtained in the discovery phase will be  
40  
41 289 validated in an independent cohort of patients and will be analyzed for a comprehensive  
42  
43 290 assessment of lipoprotein biomarkers and inflammatory biomarkers. These last two phases will  
44  
45 291 use the Selected reaction monitoring (SRM) methodology – SRM design.

## 292 **CLINICAL EVENTS**

51  
52  
53 293 In addition to these examinations, patients will have their routine hospital visits, during which  
54  
55 294 additional information will be collected on any clinical or health-related events affecting the  
56  
57 295 participants during the study period. In any case, the continuity of the patient in the study will be  
58  
59 296 assessed, as the patient's health status will always be prioritized.

## 297 **STATISTICAL ANALYSIS PLAN**

298 EDSAP is a longitudinal cohort study, in which measurements are made of different variables  
299 related to psoriasis and cardiovascular imaging at baseline and after one year of biologic  
300 treatment. This type of design allows simultaneous testing of different hypotheses, which will  
301 involve a specific statistical analysis plan and the selection of the most appropriate data treatment  
302 and models to study associations and account for potential confounders. On the one hand, cross-  
303 sectional studies will be carried out at each visit between the independent variables and the  
304 different outcome variables. Analyses will be performed using linear regression models for  
305 continuous variables and logistic regression models for categorical variables. On the other hand,  
306 longitudinal studies of the progression of subclinical atherosclerosis based on different  
307 independent variables will be performed using the most appropriate models for longitudinal data.  
308 The non-calcified coronary burden after one year of treatment was considered as the reference  
309 variable for the sample size calculation, given its clinical relevance and the existence of previous  
310 literature providing reference values (4,19). Accepting an  $\alpha=0.05$  and a  $\beta=0.2$  in a bilateral  
311 contrast for repeated (paired) means, a total of 97 subjects are needed to detect a minimum  
312 difference of 0.03 mm, a more conservative value than that obtained in previous studies (4,19).  
313 We assumed a loss to follow-up rate of 10%. To date, we have recruited a total of 120 patients,  
314 far exceeding the minimum sample size needed to detect differences in the primary endpoint.  
315 Study results will be reported in accordance with STROBE guidelines (33).

## 316 **PATIENT AND PUBLIC INVOLVEMENT**

317 None.

## 318 **DISCUSSION**

319 The EDSAP study aims to provide information on the presence and progression of subclinical  
320 atherosclerosis in patients with psoriasis in order to help establish earlier and more personalized  
321 management of care for these patients, whose life expectancy is reduced due to the increased risk  
322 of cardiovascular disease at younger ages compared to the general population.

1  
2  
3 323 Traditional prediction systems based on classical CVRFs, underestimate the actual CV risk of  
4  
5 324 patients with psoriasis and other chronic inflammatory states (8,34). There is a lack of markers  
6  
7 325 that allow us to adequately predict those patients who will develop cardiovascular disease. In this  
8  
9 326 scenario, numerous publications have emerged in recent highlighting the value of detecting  
10  
11 327 subclinical atherosclerosis through various imaging tests as a tool to overcome this gap. The use  
12  
13 328 of ultrasound techniques has shown to be an accurate biomarker of atherosclerosis presence (4).  
14  
15 329 Screening for subclinical atherosclerosis in patients with psoriasis with imaging techniques in  
16  
17 330 more than one vascular territory, such as the carotid and especially the femoral arteries, has proven  
18  
19 331 to be a reliable biomarker for cardiovascular risk assessment (15). In addition, 3DVUS is another  
20  
21 332 well-established imaging technique for quantifying early carotid and femoral atherosclerotic  
22  
23 333 burden, as well as being an accessible, novel and reliable technique (16). Recently, this technique  
24  
25 334 has been further developed to obtain plaque characterization and quantification, enabling risk  
26  
27 335 stratification based on atherosclerotic plaque burden (16). Regarding CCTA, some studies have  
28  
29 336 shown how biologics can modulate coronary plaque indices in psoriasis favorably, supporting  
30  
31 337 further studies to qualify these results (19,21,22). These results have been recently validated in a  
32  
33 338 systematic review and meta-analysis evaluating the impact of licensed biologic treatments on  
34  
35 339 blood and imaging biomarkers of CV risk in adult patients with psoriasis. The results  
36  
37 340 demonstrated how some biologic drugs were associated with a reduction in aortic vascular  
38  
39 341 inflammation (35). In this study, one of the interesting aspects to explore, and which could provide  
40  
41 342 more data on the complex relationship between cutaneous and vascular inflammation in these  
42  
43 343 patients, is whether this modulation of coronary plaques by antipsoriatic therapies is parallel to or  
44  
45 344 independent of the improvement in PASI, which would provide a more global view of the  
46  
47 345 systemic inflammation affecting the patient with psoriasis. The EDSAP study is the first study  
48  
49 346 that aims to have a comprehensive CV overview of the psoriasis patient, using novel imaging  
50  
51 347 techniques to study peripheral and coronary subclinical atherosclerosis to accurately assess  
52  
53 348 individual CV risk and minimize this risk through prevention and early treatment. This global  
54  
55 349 understanding of the disease, and the ability to see how antipsoriatic therapies modulate the  
56  
57 350 patient's internal inflammation, may represent a breakthrough in the treatment of the psoriasis

1  
2  
3 351 patient, as well as in the understanding of psoriasis as a human model of atherosclerosis in  
4  
5 352 inflammatory states.

6  
7  
8 353 As a complement to multiterritorial imaging studies, EDSAP incorporates the use of new  
9  
10 354 molecular techniques such as proteomics that could be the starting point to identify those  
11  
12 355 individuals potentially predisposed to develop atherosclerosis, allowing us to find potential  
13  
14 356 predictive and therapeutic targets. At present, few studies have evaluated the usefulness of  
15  
16 357 proteomic strategies to identify a biomarker of atherosclerosis in patients with psoriasis (36,37).  
17  
18 358 This approach aims to identify early markers of subclinical atherosclerosis that can, alone or in  
19  
20 359 combination with imaging techniques, identify individuals at increased risk. The biological  
21  
22 360 resource generated will also be available for future use in longitudinal association studies of any  
23  
24 361 parameter of interest (e.g. clinical events, response to treatment, development of risk factors,  
25  
26 362 progression of atherosclerosis, etc.), which will advance the understanding of how CV disease  
27  
28 363 initiates and progresses.

29  
30  
31 364 The main methodological advantages of this study are the strict application of protocols, the  
32  
33 365 collection of biobank samples and the prospective data collection which allows to evaluate the  
34  
35 366 impact of anti-inflammatory therapies on atheroma plaque presence and characterization. In  
36  
37 367 addition, state-of-the-art scientific techniques are being applied to measure the anatomical and  
38  
39 368 biological characteristics of subclinical atherosclerosis. However, there are limitations to be kept  
40  
41 369 in mind: this is an observational study and more vulnerable to potential confounding factors  
42  
43 370 compared to randomized controlled trials, and the open, non-randomized use of psoriasis  
44  
45 371 treatments in a small sample and with a short follow-up duration. However, this could be the  
46  
47 372 largest consecutive sample of psoriasis patients followed over time using CCTA, 3D and 2DVUS.  
48  
49 373 In addition, we will follow a consecutive sample to minimize any selection bias in longitudinal  
50  
51 374 follow-up. Finally, we will use arterial plaque imaging technology to understand modulation in  
52  
53 375 CV disease risk secondary to biological treatment.

54  
55  
56  
57 376 In conclusion, the EDSAP study is designed to study psoriasis as a model of atherosclerosis in  
58  
59 377 inflammatory states, as well as to provide clinical, imaging and molecular biomarkers, using

1  
2  
3 378 innovative imaging techniques as well as omics technologies for the prevention and treatment of  
4  
5 379 these high-risk patients for early CV events.  
6  
7

8 380 **Ethics and dissemination of results:**  
9

10 381 The study protocol has been approved by the Ethics Committee of Hospital Ramón y Cajal in  
11  
12 382 Madrid. All participants will provide written informed consent that explicitly includes consent for  
13  
14 383 biobanking of surplus biological materials, which will be provided for future research projects.  
15  
16 384 We will present our findings at national and international congresses, and peer-reviewed journals.  
17  
18

19  
20 385 **Acknowledgements:**  
21

22 386 We thank all the participants in the study and gratefully acknowledge the collaboration and  
23  
24 387 assistance of the staff at Hospital Universitario Ramón y Cajal, Hospital HM Sanchinarro,  
25  
26 388 National Institute of Health, Hospital 12 de Octubre and Atria Clinic.  
27  
28

29 389 We would also like to thank the dedication and impeccable management of the biological samples  
30  
31 390 to all the members of the Biobank of the Hospital Ramón y Cajal. Finally, we are very grateful to  
32  
33 391 all the participants in the EDSAP study, without them it would not have been possible.  
34  
35

36 392 **Data Availability statement:**  
37

38  
39 393 Our data will be published in a timely manner at the conclusion of the follow-up period and will  
40  
41 394 be made available upon request.  
42  
43

44 395  
45  
46  
47  
48  
49  
50  
51  
52  
53  
54  
55  
56  
57  
58  
59  
60



**REFERENCES**

1. Griffiths CE, Barker JN. Pathogenesis and clinical features of psoriasis. *Lancet Lond Engl*. 2007 Jul 21;370(9583):263–71.
2. Neimann AL, Shin DB, Wang X, Margolis DJ, Troxel AB, Gelfand JM. Prevalence of cardiovascular risk factors in patients with psoriasis. *J Am Acad Dermatol*. 2006 Nov 1;55(5):829–35.
3. Risk of Myocardial Infarction in Patients With Psoriasis | Acute Coronary Syndromes | JAMA | JAMA Network [Internet]. [cited 2022 Nov 30]. Available from: <https://jamanetwork.com/journals/jama/fullarticle/203598>
4. Lerman JB, Joshi AA, Chaturvedi A, Aberra TM, Dey AK, Rodante JA, et al. Coronary Plaque Characterization in Psoriasis Reveals High-Risk Features That Improve After Treatment in a Prospective Observational Study. *Circulation*. 2017 Jul 18;136(3):263–76.
5. Garshick MS, Barrett TJ, Wechter T, Azarchi S, Scher JU, Neimann A, et al. Inflammasome Signaling and Impaired Vascular Health in Psoriasis. *Arterioscler Thromb Vasc Biol*. 2019 Apr;39(4):787–98.
6. Potential Immunological Links Between Psoriasis and Cardiovascular Disease - PubMed [Internet]. [cited 2022 Dec 6]. Available from: <https://pubmed.ncbi.nlm.nih.gov/29910818/>
7. Mehta NN, Krishnamoorthy P, Yu Y, Khan O, Raper A, Van Voorhees A, et al. The impact of psoriasis on 10-year Framingham risk. *J Am Acad Dermatol*. 2012 Oct;67(4):796–8.
8. Berna-Rico E, Abbad-Jaime de Aragon C, Garcia-Aparicio A, Palacios-Martinez D, Ballester-Martinez A, Carrascosa JM, et al. Cardiovascular Screening Practices and Statin Prescription Habits in Patients with Psoriasis among Dermatologists, Rheumatologists and Primary Care Physicians. *Acta Derm Venereol*. 2023 Mar 28;103:adv5087.
9. Gonzalez-Cantero A, Gonzalez-Cantero J, Sanchez-Moya AI, Perez-Hortet C, Arias-Santiago S, Schoendorff-Ortega C, et al. Subclinical atherosclerosis in psoriasis. Usefulness of femoral artery ultrasound for the diagnosis, and analysis of its relationship with insulin resistance. *PloS One*. 2019;14(2):e0211808.
10. Armstrong AW, Harskamp CT, Ledo L, Rogers JH, Armstrong EJ. Coronary artery disease in patients with psoriasis referred for coronary angiography. *Am J Cardiol*. 2012 Apr 1;109(7):976–80.
11. Mansouri B, Kivelevitch D, Natarajan B, Joshi AA, Ryan C, Benjegerdes K, et al. Comparison of Coronary Artery Calcium Scores Between Patients With Psoriasis and Type 2 Diabetes. *JAMA Dermatol*. 2016 Nov 1;152(11):1244–53.
12. Hjuler KF, Böttcher M, Vestergaard C, Deleuran M, Raaby L, Bøtker HE, et al. Increased Prevalence of Coronary Artery Disease in Severe Psoriasis and Severe Atopic Dermatitis. *Am J Med*. 2015 Dec;128(12):1325–1334.e2.
13. Tinggaard AB, Hjuler KF, Andersen IT, Winther S, Iversen L, Böttcher M. Prevalence and severity of coronary artery disease linked to prognosis in psoriasis and psoriatic arthritis patients: a multi-centre cohort study. *J Intern Med*. 2021 Sep;290(3):693–703.
14. Fernández-Friera L, Peñalvo JL, Fernández-Ortiz A, Ibañez B, López-Melgar B, Laclaustra M, et al. Prevalence, Vascular Distribution, and Multiterritorial Extent of Subclinical



- 1  
2  
3 437 Atherosclerosis in a Middle-Aged Cohort: The PESA (Progression of Early Subclinical  
4 438 Atherosclerosis) Study. *Circulation*. 2015 Jun 16;131(24):2104–13.  
5  
6 439 15. González-Cantero A, Gonzalez-Cantero J, Sanchez-Moya AI, Perez-Hortet C, Arias-  
7 440 Santiago S, Martin-Rodriguez JL, et al. Femoral artery ultrasound for improving the  
8 441 detection of atherosclerosis in psoriasis. *J Am Acad Dermatol*. 2019 Mar;80(3):784–6.  
9  
10 442 16. López-Melgar B, Fernández-Friera L, Oliva B, García-Ruiz JM, Peñalvo JL, Gómez-  
11 443 Talavera S, et al. Subclinical Atherosclerosis Burden by 3D Ultrasound in Mid-Life: The  
12 444 PESA Study. *J Am Coll Cardiol*. 2017 Jul 18;70(3):301–13.  
13  
14 445 17. Kaur S, Kingo K, Zilmer M. Psoriasis and Cardiovascular Risk—Do Promising New  
15 446 Biomarkers Have Clinical Impact? *Mediators Inflamm*. 2017;2017:7279818.  
16  
17 447 18. 2019 ESC/EAS Guidelines for the management of dyslipidaemias: lipid modification to  
18 448 reduce cardiovascular risk | *European Heart Journal* | Oxford Academic [Internet]. [cited  
19 449 2022 Dec 13]. Available from:  
20 450 <https://academic.oup.com/eurheartj/article/41/1/111/5556353>  
21  
22 451 19. Elnabawi YA, Dey AK, Goyal A, Groenendyk JW, Chung JH, Belur AD, et al. Coronary  
23 452 artery plaque characteristics and treatment with biologic therapy in severe psoriasis: results  
24 453 from a prospective observational study. *Cardiovasc Res*. 2019 Mar 15;115(4):721–8.  
25  
26 454 20. López-Melgar B, Mass V, Nogales P, Sánchez-González J, Entekin R, Collet-Billon A, et  
27 455 al. New 3-Dimensional Volumetric Ultrasound Method for Accurate Quantification of  
28 456 Atherosclerotic Plaque Volume. *JACC Cardiovasc Imaging*. 2022 Jun 1;15(6):1124–35.  
29  
30 457 21. Elnabawi YA, Dey AK, Mehta NN. Emerging Applications of Coronary CT Angiography  
31 458 in Coronary Heart Disease: Getting Better with Time. *Eur Heart J*. 2018 Nov  
32 459 1;39(41):3682–4.  
33  
34 460 22. Hjuler KF, Bøttcher M, Vestergaard C, Bøtcher HE, Iversen L, Kragballe K. Association  
35 461 Between Changes in Coronary Artery Disease Progression and Treatment With Biologic  
36 462 Agents for Severe Psoriasis. *JAMA Dermatol*. 2016 Oct 1;152(10):1114–21.  
37  
38 463 23. Hu SCS, Lan CCE. Psoriasis and Cardiovascular Comorbidities: Focusing on Severe  
39 464 Vascular Events, Cardiovascular Risk Factors and Implications for Treatment. *Int J Mol*  
40 465 *Sci*. 2017 Oct 21;18(10):2211.  
41  
42 466 24. Estruch R, Ros E, Salas-Salvadó J, Covas MI, Corella D, Arós F, et al. Primary Prevention  
43 467 of Cardiovascular Disease with a Mediterranean Diet Supplemented with Extra-Virgin  
44 468 Olive Oil or Nuts. *N Engl J Med*. 2018 Jun 21;378(25):e34.  
45  
46 469 25. Finlay AY, Khan GK. Dermatology Life Quality Index (DLQI)--a simple practical measure  
47 470 for routine clinical use. *Clin Exp Dermatol*. 1994 May;19(3):210–6.  
48  
49 471 26. Touboul PJ, Hennerici MG, Meairs S, Adams H, Amarenco P, Desvarieux M, et al.  
50 472 Mannheim Intima-Media Thickness Consensus. *Cerebrovasc Dis*. 2004;18(4):346–9.  
51  
52 473 27. Kwan AC, May HT, Cater G, Sibley CT, Rosen BD, Lima JAC, et al. Coronary artery  
53 474 plaque volume and obesity in patients with diabetes: the factor-64 study. *Radiology*. 2014  
54 475 Sep;272(3):690–9.  
55  
56  
57  
58  
59  
60

- 1  
2  
3 476 28. Sorokin AV, Patel N, Abdelrahman KM, Ling C, Reimund M, Graziano G, et al. Complex  
4 477 association of apolipoprotein E-containing HDL with coronary artery disease burden in  
5 478 cardiovascular disease. *JCI Insight*. 7(10):e159577.
- 7 479 29. Martínez-Bartolomé S, Navarro P, Martín-Maroto F, López-Ferrer D, Ramos-Fernández A,  
8 480 Villar M, et al. Properties of average score distributions of SEQUEST: the probability ratio  
9 481 method. *Mol Cell Proteomics MCP*. 2008 Jun;7(6):1135–45.
- 11 482 30. Navarro P, Vázquez J. A refined method to calculate false discovery rates for peptide  
12 483 identification using decoy databases. *J Proteome Res*. 2009 Apr;8(4):1792–6.
- 14 484 31. García-Marqués F, Trevisan-Herraz M, Martínez-Martínez S, Camafeita E, Jorge I, Lopez  
15 485 JA, et al. A Novel Systems-Biology Algorithm for the Analysis of Coordinated Protein  
16 486 Responses Using Quantitative Proteomics. *Mol Cell Proteomics MCP*. 2016  
17 487 May;15(5):1740–60.
- 19 488 32. Isern J, Martín-Antonio B, Ghazanfari R, Martín AM, López JA, del Toro R, et al. Self-  
20 489 renewing human bone marrow mesospheres promote hematopoietic stem cell expansion.  
21 490 *Cell Rep*. 2013 May 30;3(5):1714–24.
- 23 491 33. von Elm E, Altman DG, Egger M, Pocock SJ, Gøtzsche PC, Vandenbroucke JP, et al. The  
24 492 Strengthening the Reporting of Observational Studies in Epidemiology (STROBE)  
25 493 Statement: guidelines for reporting observational studies. *Int J Surg Lond Engl*. 2014  
26 494 Dec;12(12):1495–9.
- 28 495 34. Gonzalez-Cantero A, Reddy AS, Dey AK, Gonzalez-Cantero J, Munger E, Rodante J, et al.  
29 496 Underperformance of clinical risk scores in identifying imaging-based high cardiovascular  
30 497 risk in psoriasis: results from two observational cohorts. *Eur J Prev Cardiol*. 2022 Mar  
31 498 30;29(4):591–8.
- 33 499 35. González-Cantero A, Ortega-Quijano D, Álvarez-Díaz N, Ballester MA, Jimenez-Gomez  
34 500 N, Jaen P, et al. Impact of Biological Agents on Imaging and Biomarkers of Cardiovascular  
35 501 Disease in Patients with Psoriasis: A Systematic Review and Meta-Analysis of Randomized  
36 502 Placebo-Controlled Trials. *J Invest Dermatol*. 2021 Oct;141(10):2402–11.
- 38 503 36. Kaiser H, Wang X, Kvist-Hansen A, Krakauer M, Gørtz PM, McCauley BD, et al.  
39 504 Biomarkers of subclinical atherosclerosis in patients with psoriasis. *Sci Rep*. 2021 Nov  
40 505 2;11(1):21438.
- 42 506 37. Qi F, Tan Y, Yao A, Yang X, He Y. Psoriasis to Psoriatic Arthritis: The Application of  
43 507 Proteomics Technologies. *Front Med*. 2021;8:681172.

#### 508 **Author contributions:**

509 Carlota Abbad- Jaime de Aragón.: Investigation, Conceptualization, Methodology, Original draft  
510 preparation, Visualization. Emilio Berna-Rico.: Conceptualization, Methodology, Visualization,  
511 Writing- Reviewing and Editing. María Asunción Ballester-Martinez.: Writing- Reviewing and  
512 Editing. Pedro Jaén.: Writing- Reviewing and Editing. Jorge Solís.: Writing- Reviewing and  
513 Editing. María G. Barderas.: Software, Validation. Leticia Fernández- Frieria.: Writing-

1  
2  
3 514 Reviewing and Editing. Nehal N Mehta.: Writing- Reviewing and Editing. Joel M Gelfand.:  
4  
5 515 Writing- Reviewing and Editing. Álvaro González-Cantero.: Conceptualization, Methodology,  
6  
7 516 Writing- Reviewing and Editing, Funding acquisition, Supervision.  
8  
9

10 517 **Funding statement:**

11  
12 518 The EDSAP study is funded by competitive independent grants from the *Instituto de Salud Carlos*  
13  
14 519 *III* and the National Psoriasis Foundation and also by non-competitive investigator-initiated  
15  
16 520 studies (Leo-Pharma, Almirall and Amgen).  
17  
18  
19

20 521 **Competing interests statement:**

21  
22 522 NNM is a full- time US government employee and has served as a consultant for several  
23  
24 523 pharmaceutical companies, receiving grants and/or research funding; and as a principal  
25  
26 524 investigator for the NIH receiving grants and/or research funding. JMG served as a consultant for  
27  
28 525 several pharmaceutical companies, receiving honoraria and research grants (to the Trustees of the  
29  
30 526 University of Pennsylvania). JMG is a co-patent holder of resiquimod for treatment of cutaneous  
31  
32 527 T cell lymphoma. JMG receives honoraria from multiple organisms, for being a Deputy Editor  
33  
34 528 for the Journal of Investigative Dermatology, Chief Medical Editor for Healio Psoriatic Disease.  
35  
36 529 He is also a member of the Board of Directors for the International Psoriasis Council, receiving  
37  
38 530 no honoraria. ACG has served as a consultant for several pharmaceutical companies receiving  
39  
40 531 grants/other payments. MABM has served as a consultant for several pharmaceutical companies  
41  
42 532 receiving honoraria. LFF, JS, EBR, MGB, PJ, CAJ have no interests to disclose.  
43  
44  
45  
46  
47  
48  
49  
50  
51  
52  
53  
54  
55  
56  
57  
58  
59  
60

1  
2  
3  
4  
5  
6  
7  
8  
9  
10  
11  
12  
13  
14  
15  
16  
17  
18  
19  
20  
21  
22  
23  
24  
25  
26  
27  
28  
29  
30  
31  
32  
33  
34  
35  
36  
37  
38  
39  
40  
41  
42  
43  
44  
45  
46  
47  
48  
49  
50  
51  
52  
53  
54  
55  
56  
57  
58  
59  
60

541 **Figure legends:**

542 **Figure 1:** EDSAP study flow. CCTA, coronary computed tomography angiography. 2D, 2-  
543 dimensional. 3D, 3-dimensional.

544 **Figure 2.** Participant timeline. This flow diagram illustrates the participant timeline including  
545 enrollment, baseline and 1-year follow up visits, the analysis of data and publication of results.

546 **Figure 3.** 2D vascular ultrasound of atherosclerotic plaque (white arrow) in the right femoral  
547 artery and (A) and 3D vascular ultrasound of another atherosclerotic plaque (black arrow).

548 **Figure 4.** Left anterior descending coronary artery with (green arrow) and without atheroma  
549 plaque by CCTA.

550

551

552

For peer review only

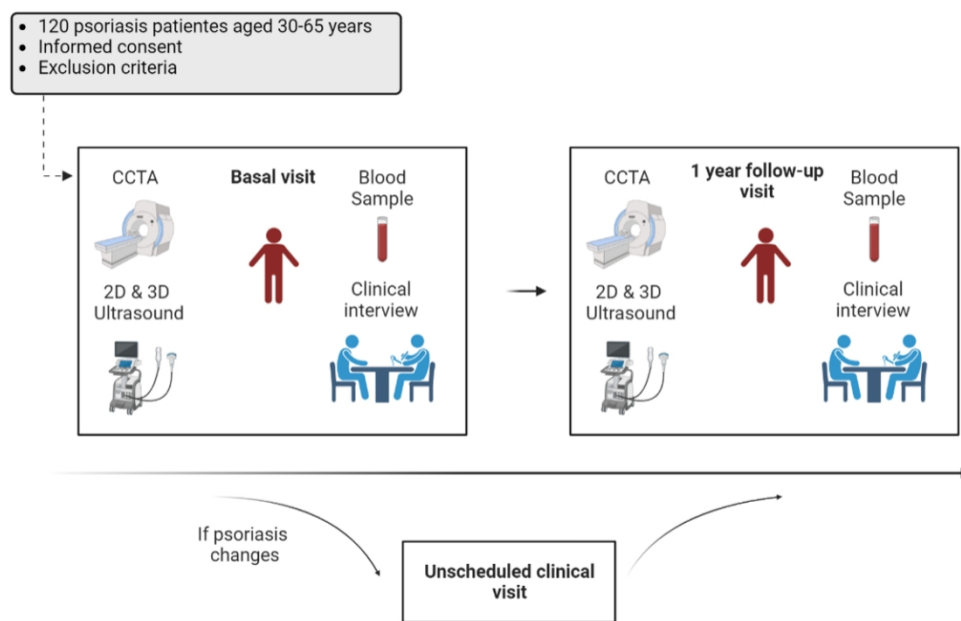

Figure 1. EDSAP study flow. CCTA, coronary computed tomography angiography. 2D, 2-dimensional. 3D, 3-dimensional.

100x64mm (300 x 300 DPI)

1  
2  
3  
4  
5  
6  
7  
8  
9  
10  
11  
12  
13  
14  
15  
16  
17  
18  
19  
20  
21  
22  
23  
24  
25  
26  
27  
28  
29  
30  
31  
32  
33  
34  
35  
36  
37  
38  
39  
40  
41  
42  
43  
44  
45  
46  
47  
48  
49  
50  
51  
52  
53  
54  
55  
56  
57  
58  
59  
60

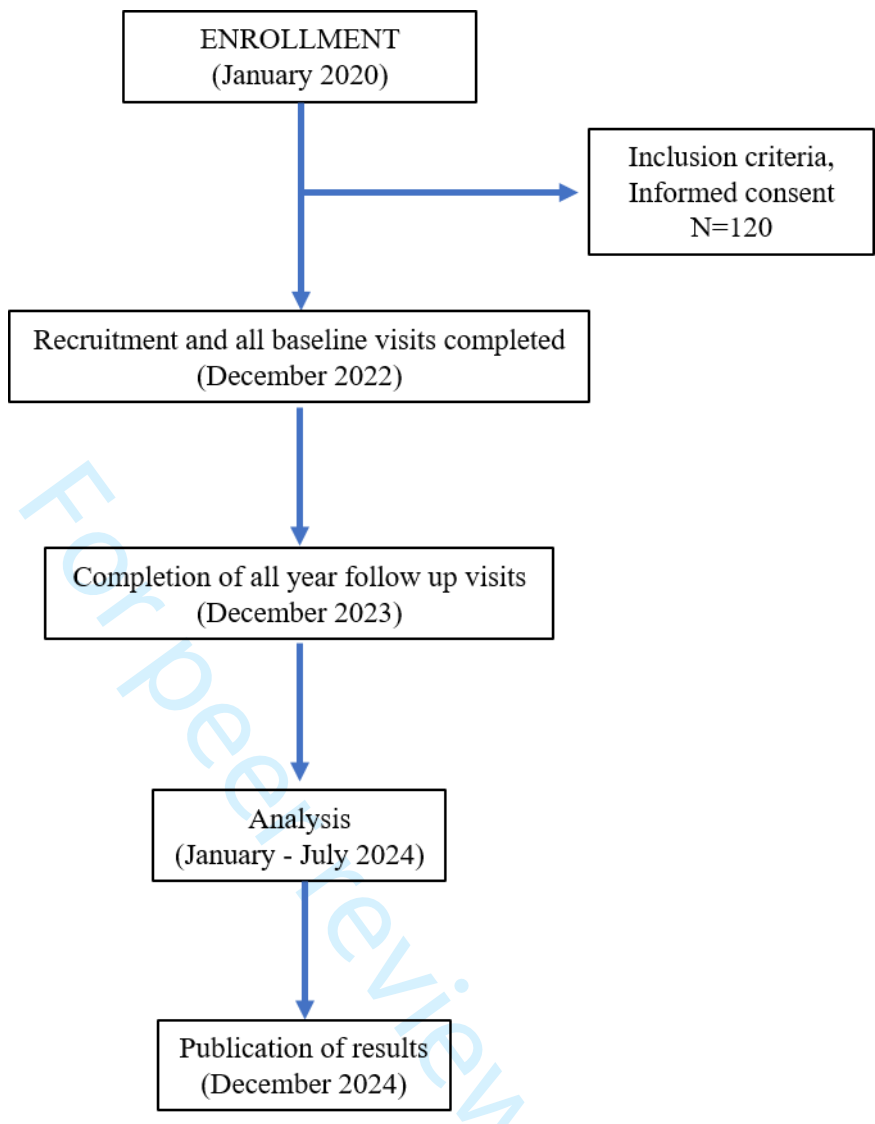



Figure 3. 2D vascular ultrasound of atherosclerotic plaque (white arrow) in the right femoral artery and (A) and 3D vascular ultrasound of another atherosclerotic plaque (black arrow).

79x34mm (300 x 300 DPI)

1  
2  
3  
4  
5  
6  
7  
8  
9  
10  
11  
12  
13  
14  
15  
16  
17  
18  
19  
20  
21  
22  
23  
24  
25  
26  
27  
28  
29  
30  
31  
32  
33  
34  
35  
36  
37  
38  
39  
40  
41  
42  
43  
44  
45  
46  
47  
48  
49  
50  
51  
52  
53  
54  
55  
56  
57  
58  
59  
60

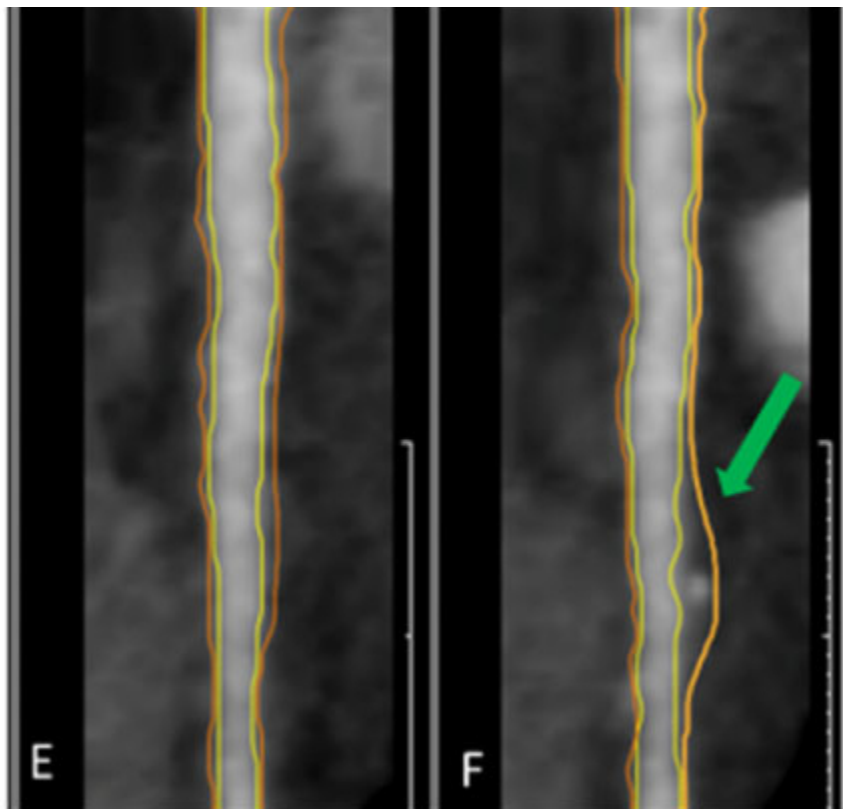

Figure 4. Left anterior descending coronary artery with (green arrow) and without atheroma plaque by CCTA

190x180mm (57 x 57 DPI)
